# Supplementary material for: Can antipoverty programmes save lives? Quasi-experimental evidence from the Earned Income Tax Credit in the USA
Source: PubMed Central journal article supplement — BMJ Open. 2020 Aug 20;10(8):e037051. doi: 10.1136/bmjopen-2020-037051 (PMC7443298; doi:10.1136/bmjopen-2020-037051), 2020-08-20
Supplement: bmjopen-2020-037051.draft_revisions.pdf [file bmjopen-2020-037051.draft_revisions.pdf]

# BMJ Open

BMJ Open is committed to open peer review. As part of this commitment we make the peer review history of every article we publish publicly available.

When an article is published we post the peer reviewers' comments and the authors' responses online. We also post the versions of the paper that were used during peer review. These are the versions that the peer review comments apply to.

The versions of the paper that follow are the versions that were submitted during the peer review process. They are not the versions of record or the final published versions. They should not be cited or distributed as the published version of this manuscript.

BMJ Open is an open access journal and the full, final, typeset and author-corrected version of record of the manuscript is available on our site with no access controls, subscription charges or pay-per-view fees (<http://bmjopen.bmj.com>).

If you have any questions on BMJ Open's open peer review process please email [info.bmjopen@bmj.com](mailto:info.bmjopen@bmj.com)

# BMJ Open

## Can Antipoverty Programs Save Lives? Quasi-experimental evidence from the Earned Income Tax Credit.

|                               |                                                                                                            |
|-------------------------------|------------------------------------------------------------------------------------------------------------|
| Journal:                      | <i>BMJ Open</i>                                                                                            |
| Manuscript ID                 | bmjopen-2020-037051                                                                                        |
| Article Type:                 | Original research                                                                                          |
| Date Submitted by the Author: | 31-Jan-2020                                                                                                |
| Complete List of Authors:     | Muennig, Peter; Columbia University, Vail, Daniel; Stanford University Hakes, Jahn; U.S. Bureau of Census, |
| Keywords:                     | PUBLIC HEALTH, Health policy < HEALTH SERVICES ADMINISTRATION & MANAGEMENT, SOCIAL MEDICINE                |
|                               |                                                                                                            |

SCHOLARONE™  
Manuscripts

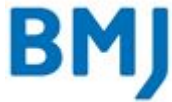

I, the Submitting Author has the right to grant and does grant on behalf of all authors of the Work (as defined in the below author licence), an exclusive licence and/or a non-exclusive licence for contributions from authors who are: i) UK Crown employees; ii) where BMJ has agreed a CC-BY licence shall apply, and/or iii) in accordance with the terms applicable for US Federal Government officers or employees acting as part of their official duties; on a worldwide, perpetual, irrevocable, royalty-free basis to BMJ Publishing Group Ltd ("BMJ") its licensees and where the relevant Journal is co-owned by BMJ to the co-owners of the Journal, to publish the Work in this journal and any other BMJ products and to exploit all rights, as set out in our [licence](#).

The Submitting Author accepts and understands that any supply made under these terms is made by BMJ to the Submitting Author unless you are acting as an employee on behalf of your employer or a postgraduate student of an affiliated institution which is paying any applicable article publishing charge ("APC") for Open Access articles. Where the Submitting Author wishes to make the Work available on an Open Access basis (and intends to pay the relevant APC), the terms of reuse of such Open Access shall be governed by a Creative Commons licence – details of these licences and which [Creative Commons](#) licence will apply to this Work are set out in our licence referred to above.

Other than as permitted in any relevant BMJ Author's Self Archiving Policies, I confirm this Work has not been accepted for publication elsewhere, is not being considered for publication elsewhere and does not duplicate material already published. I confirm all authors consent to publication of this Work and authorise the granting of this licence.

1  
2  
3 Can Antipoverty Programs Save Lives? Quasi-experimental evidence from the Earned  
4 Income Tax Credit.  
5  
6  
7  
8  
9

10 Peter Muennig, M.D., M.P.H.<sup>1</sup>

11 Daniel Vail<sup>2</sup>

12 Jahn K. Hakes, Ph.D.<sup>3</sup>

13  
14  
15  
16  
17  
18  
19  
20 <sup>1</sup> Mailman School of Public Health at Columbia University, Health Policy and Management,  
21 New York, US

22  
23  
24 <sup>2</sup> Stanford University School of Medicine, Palo Alto, US

25  
26  
27 <sup>3</sup> US Bureau of the Census, Suitland, Suitland-Silver Hill, MD, US

28  
29  
30  
31 Corresponding Author

32 Peter Muennig, MD, MPH

33 Professor

34 Mailman School of Public Health

35 Columbia University

36 722 West 168th St.

37 ARB 4th Floor

38 New York, NY 10032

39 Pm124@columbia.edu

40 +1 347-533-3415

41  
42  
43  
44  
45  
46  
47  
48  
49  
50  
51  
52  
53  
54  
55 Key Words (MeSH)

1  
2  
3 Health and Socio-Economic Status; Health Policy; Non-Medical Determinants of Health

4  
5 **Abstract**

6  
7  
8 Objective: To examine whether state-level supplements to the Earned Income Tax Credit  
9  
10 (EITC) reduce state-level mortality. The EITC is a Federal program that supplements the  
11  
12 wages of lower-income workers by providing larger returns when taxes are filed.  
13

14  
15 Setting. Multi-year population census data linked to vital status.

16  
17 Participants. 793,000 respondents within the National Longitudinal Mortality Survey  
18  
19 (NLMS) between 1986-2011.  
20

21  
22 Intervention. We used a quasi-experimental difference-in-difference approach. We  
23  
24 exploited state-level variation in EITC payouts to estimate the effects of EITC on adult  
25  
26 survival among those who did and did not receive supplemental EITC payments between  
27  
28 1986-2011.  
29

30  
31 Results. We find that implementation of a state supplemental EITC program increased  
32  
33 survival. EITC is associated with a hazard ratio of 0.97 (standard error = 0.01) for each  
34  
35 \$100 of EITC increase ( $p < 0.05$ ).  
36  
37

38  
39 Conclusion. State-level supplemental EITC may be an effective means of increasing survival  
40  
41 in the US.  
42  
43  
44

45  
46 Keywords: Health Policy; Earned Income Tax Credit; Socio-Economic Status and Health  
47  
48  
49

50 Article summary  
51  
52  
53  
54  
55  
56  
57  
58  
59  
60

- Income support programs may improve human survival both by providing material support to purchase life-saving goods (e.g., medical care or healthy food) and by reducing psychological stress.
- We use a quasi-experimental design to investigate the independent effect of state-level Earned Income Tax Credit (EITC) supplements.
- We also identify individuals who are eligible to receive additional income and then follow the vital status of those individuals over many years.
- While our method is causal in design, it does not necessarily provide precise estimates because states that can afford EITC payments may also simultaneously invest in other life-saving interventions.
- We find that each \$100 in additional EITC support provided by the state annually will increase survival by roughly 3% (2 weeks).

## Introduction

In the US life expectancy has declined relative to other nations for decades as lower wages and higher health costs have reduced disposable income for households below the US median for earnings <sup>1-3</sup>. One policy that has promise to address declining income, and potentially declining health, is the Earned Income Tax Credit (EITC). The EITC is designed to supplement earnings in lower-paying jobs by providing a monetary credit to low-income workers who file taxes. This program has the effect of restoring some of the disposable income lost to lower-income households as high paying factory jobs have disappeared in the United States, thereby potentially also restoring health <sup>4</sup>.

The EITC is the largest means-tested anti-poverty program in the United States <sup>5</sup>. Historically it has received broad bipartisan support, having been created under President Ford in 1975, and subsequently expanded during the terms of Presidents Clinton, Bush, and Obama <sup>6</sup>.

Poverty is associated with a greater burden of disease than smoking and obesity combined in the US <sup>7 8</sup>. Poverty takes a toll on health by increasing one's risk of environmental exposures (e.g., living near freeway intersections or living in housing with peeling lead paint) and reducing purchasing power (e.g., of healthy food or out-of-pocket medical expenses) <sup>4</sup>. Likewise, EITC can increase employment, which is also associated with decreased mortality (possibly because it can increase access to employer-based health insurance, health savings accounts, and social capital) <sup>9-12</sup>. However, the largest health effects associated with EITC are now believed to arise from incremental changes in psychological stress, which causes the release of glucocorticoids that damage neural

1  
2  
3 structures associated with executive function, memory, and homeostatic processes, such as  
4  
5 the regulation of blood sugar and blood pressure.<sup>10 13-18</sup>  
6  
7

8       Glucocorticoids are meant to increase survival among our hunter-gatherer  
9  
10 ancestors by diverting glucose and oxygen from the brain and reproductive organs to  
11  
12 muscles, allowing us to flee predators.<sup>19 20</sup> Modern-day society, unfortunately, is filled with  
13  
14 stressors that activate these primitive, neurotoxic systems, leading to hypertension,  
15  
16 obesity, and interfering with health behaviors.<sup>18</sup>  
17  
18

19       Notably, even small increases in income support among low-income households can  
20  
21 lead to increased short-term perceived financial security even if the gains are too small to  
22  
23 increase savings (and therefore demonstrable financial security).<sup>10 21 22</sup> Perceived security  
24  
25 may be one of the most important determinants of stress among low-income households.<sup>16</sup>  
26  
27  
28  
29  
30  
31  
32  
33  
34  
35  
36  
37  
38  
39  
40  
41  
42  
43  
44  
45  
46  
47  
48  
49  
50  
51  
52  
53  
54  
55  
56  
57  
58  
59  
60

31  
32  
33       The hypothesis that EITC might reduce premature mortality is supported by  
34  
35 previous research <sup>26-33</sup>. Because some states have supplemented federal EITC and some  
36  
37 have not, this invites a quasi-experimental analysis in which natural variation in state  
38  
39 policies can be used to estimate the impact of state-level supplemental EITC on health or  
40  
41 survival. However, to our knowledge, there is only one dataset that is capable of identifying  
42  
43 large numbers of individuals who are eligible for EITC by their state of residence that also  
44  
45 provides longer-term follow up of their survival effects—the National Longitudinal  
46  
47 Mortality Survey (NLMS).<sup>34</sup>  
48  
49  
50  
51  
52  
53  
54  
55  
56  
57  
58  
59  
60

52       The size of the EITC tax credit varies considerably by family size and marital status.  
53  
54 While an adult with no children can earn up to \$400 at tax time, single parent with 3  
55  
56  
57  
58  
59  
60



1  
2  
3 children can earn over \$6,000. When EITC-eligible individuals are identified, it becomes  
4 possible to increase the accuracy of the analysis and to remove confounding of survival  
5 outcomes associated with emigration of healthier individuals to wealthier states <sup>35 36</sup>. Long-  
6 term follow up for survival is necessary because EITC-eligible individuals and families tend  
7 to be under age 65 and employed, and therefore tend to be healthier. The benefit of  
8 reduced exposure to poverty in early- and middle-aged adults is only likely to manifest  
9 after the age of 65 <sup>37</sup>.

10  
11  
12  
13  
14  
15  
16  
17  
18  
19  
20 The NLMS is the largest mortality survey in the US, and allows us to conduct a  
21 targeted and comprehensive examination of the impact of state-level supplemental EITC on  
22 survival. Others have examined variation by family size <sup>27-30 38</sup> and by state level of  
23 supplementation <sup>33</sup>. However, these analyses are limited by assumptions necessary when  
24 using smaller and less detailed datasets.  
25  
26  
27  
28  
29  
30

31 A particular problem faced by some previous quasi-experimental analyses is that it  
32 was necessary to look at aggregate state-level effects (e.g., among those with family  
33 incomes close to the poverty line) rather than effects among individuals with a high-  
34 probability of EITC receipt. By using the very large and detailed NLMS, administered by the  
35 Census Bureau, we are able to identify individuals likely to receive supplemental EITC and  
36 to explore dose-response effects within a quasi-experimental design. According to NLMS  
37 and Census Bureau officials, ours is the first study to use longitudinal mortality data from  
38 the NLMS to assess the impacts of state-level supplemental EITC on survival.  
39  
40  
41  
42  
43  
44  
45  
46  
47  
48  
49  
50  
51  
52  
53  
54  
55  
56  
57  
58  
59  
60

## Methods

### *Overview*

We use survival models to estimate the impact of state-level supplemental EITC on survival. The time frame for our analysis is 1986-2011, with mortality follow-up through the end of 2011. During that time frame, federal and state EITC policies regarding eligible incomes and size of the tax credit changed considerably (Table 1). The tax years we analyzed were from 1985 to 2010, as the EITC rate applied to tax year  $t$  income would benefit the family income in year  $t+1$ . Non-recipients were excluded from the analysis.

Each respondent's record in our data set is recorded in person-years, extending from their year of CPS/ASEC interview for the NLMS to their year of exit by death or by reaching the end of mortality follow up at the end of 2011. We limited our analysis to individuals under the age of 65 because many Americans will have retired by then and are ineligible for EITC. However, mortality follow up extends beyond this window. A 64-year-old at the time of survey would be followed to 69, 74, or until December 31, 2011 depending on the analysis used.

### *Data*

While the NLMS contains multiple census data sources, the primary source of data is from the March Annual and Social Economic Supplements of the Current Population Survey. This supplement is an annual survey designed to collect detailed information about income, migration, health insurance, and a broader range of general economic data for persons aged 15 years and over. Roughly 60,000 households are interviewed annually in

1  
2  
3 the March CPS. In that survey, one member of each household provides information for all  
4  
5 family members.  
6

7  
8 The March CPS and NLMS are weighted and standardized to be reflective of the US  
9  
10 population. The NLMS currently consists of approximately 3.8 million records with over  
11  
12 560,000 identified deaths up through December 31, 2011.<sup>39</sup> We use 793,000 records of  
13  
14 adults aged 18-64 over 26 years (1986-2011). These data were weighted to be  
15  
16 representative of the U.S. population under age 65 at the time of interview. The NLMS data  
17  
18 from CPS/ASEC is periodically linked to the set of U.S. death certificates collected by the  
19  
20 National Center for Health Statistics via the National Death Index (NDI).  
21  
22  
23

24  
25 Income cutoffs for supplemental EITC eligibility vary by state. Our information on  
26  
27 state EITC cutoffs and eligibility for tax credits comes from source documents generously  
28  
29 provided to us by TAXSIM<sup>40 41</sup>. We also added information from the Minnesota Working  
30  
31 Family Credit from 1998 to 2010<sup>42</sup>, which differs somewhat from credits offered by other  
32  
33 states.  
34  
35  
36  
37

### 38 *Variables*

39  
40  
41 Eligibility for EITC and the size of the tax credit received by eligible households,  
42  
43 were estimated using reported family income, marital status, number of children, and the  
44  
45 rules for supplemental EITC eligibility within each state. We use the March CPS to  
46  
47 determine the number of children in each household, the marital status of the  
48  
49 householders, and the inflation-adjusted household income. We then determine whether a  
50  
51 household is eligible for EITC at the federal level as well as the additional credit, if any, for  
52  
53 any given state.  
54  
55  
56  
57  
58  
59  
60

1  
2  
3 Some identification problems that remain: (1) we don't know if the head of  
4 household is consistently employed (and thus eligible to claim EITC); (2) how many years  
5 of state EITC exposure a given family had, because of (a) moving, (b) divorce, (c) changes  
6 in number of kids, or (d) pay raises at work; (3) we were unable to estimate the effects of  
7 total EITC exposure over time based on the year the state adopted EITC (due to  
8 multicollinearity between year of supplemental EITC adoption and other control variables  
9 in the model).

10  
11  
12 The exposure variables of interest for the survival models are the estimated EITC  
13 receipts – “Federal EITC” and “state EITC” – in respondent year ( $t$ ) from family income  
14 earned in year  $t-1$ , as reported in the interview in year  $t$ . The EITC receipts are calculated  
15 from the tax-year specific formulas from TAXSIM, and are applied to the subsequent  
16 person-year observation. Both the “Federal EITC” and “state EITC” receipts are divided into  
17 \$100 units to help with the presentation of small parameter estimates from the  
18 regressions. The EITC receipts are converted into real \$2015 using the Consumer Price  
19 Index (CPI).

20  
21 To adjust for personal characteristics, we include control variables for (a) age at  
22 person-year, (b) sex, (c) marital status, (d) race or ethnicity, (e) educational attainment, (f)  
23 income, and (g) employment status in addition to the state and Federal EITC measures.  
24 Other than age, income, and EITC receipts, these variables are measured as binary  
25 indicators. The descriptive statistics for the proportions of those indicators are shown in  
26 Table 2 along with the means of the continuous variables. The central tendency is  
27 expressed as standard deviations (SD) of the continuous variables (SD (x)), and as  
28 standard errors (SE) for the proportion (SE (p)).

1  
2  
3 The categories for sex are male (reference group) and female. For marital status  
4 they are married (reference group) and not married, which includes widows, divorcees,  
5 separated persons, and the never married. The categories for race and ethnicity are  
6 Hispanic, White non-Hispanic (reference group), Black non-Hispanic, American  
7 Indian/Alaskan Native non-Hispanic, and Asian/Pacific Islander non-Hispanic. The  
8 categories for educational attainment are college degree, some college, high school diploma  
9 (reference group), and no diploma. The categories for employment are employed  
10 (reference group), unemployed, and “not in labor force.” These binary indicators are  
11 assigned to each person based on their response at their CPS/ASEC interview (at baseline)  
12 and are used through all person-years. These demographic characteristics are liable to  
13 change as a result of exposure to EITC.  
14  
15  
16  
17  
18  
19  
20  
21  
22  
23  
24  
25  
26  
27  
28

29 Family incomes are asked during their CPS/ASEC interview. The dollar amount at  
30 the time of interview is adjusted to the CPI-adjusted purchasing power of the person-year  
31 for calculation of nominal EITC receipts. Both the family income and EITC receipts are then  
32 adjusted to year 2015 dollars in the regression to keep purchasing power constant across  
33 the range of the time series. To correct for the right-skewed distribution of income, we use  
34 the natural logarithm for the variable and assign the value of zero when income is zero or  
35 negative. The regression uses age at person-year instead of age at interview in order to  
36 properly adjust for age-relative hazards of mortality.  
37  
38  
39  
40  
41  
42  
43  
44  
45  
46  
47  
48  
49

#### 50 *Patient and public involvement*

51  
52 No patient involvement.  
53  
54  
55  
56  
57  
58  
59  
60

### *Model specification*

In interpreting these results, it is important to consider that our final, statistically-significant models were not pre-specified. Rather, they were re-specified in response to reviewer comments over various revisions of this manuscript.

We use Cox proportional hazards models (with state level fixed effects and errors clustered at the primary sampling unit) to estimate the impact of state-level EITC generosity on 5-year, 10-year, and maximum survival among adults (ages 18-64) between 1986 and 2011. We used a difference-in-difference model with an intention-to-treat design, assessing mortality according to people's eligibility for EITC on a state-by-state basis. While eligibility will diverge from receipt of EITC funds, this design is the best way to assess the efficacy of the EITC program as it actually exists; discordance between the program's intended and actual recipients represents an important shortcoming in the program.

Selecting a length of follow-up time over which to measure EITC's effects on survival presents a conflict; shorter follow-up times are unlikely to capture EITC's effects on chronic disease and other conditions that may impact long-term survival. However, longer follow-up times introduce more uncertainty about possible changes in the socioeconomic status of the participants in our sample. Because individuals' incomes, household sizes, marital status, and states of residence are known only at the time of interview in the Current Population Survey, we do not know how social and demographic variables change over time.

We elected to use 10-year survival rates as our primary outcome measure because it represents a reasonable window for both capturing differences in survival between groups, and for minimizing error in our identification of EITC eligibility due to changes in family

1  
2  
3 income, marital status, or family size (which are increasingly likely with a longer follow-up  
4 window). As a sensitivity analysis, we also estimated models with a shorter follow-up  
5 window (using 5-year survival as the model outcome) as well as models with a longer  
6 follow-up window (using survival rates over the entire follow-up period available for each  
7 respondent in the NLMS).  
8  
9

10  
11  
12  
13  
14  
15 Our set of person-year records consists of those records with “age at interview” of at  
16 least 18 years, and extending up through either (a) “age at person year” of 64 years, (b) the  
17 year of death (with “failure”=1), or (c) end of follow up at 2011. An additional inclusion  
18 rule includes only respondents with estimated family income that is less than twice the  
19 maximum Federal EITC income allowed for the respondent’s family size. This income limit  
20 is to eliminate any possible regression distortions caused by observations on high-income  
21 individuals, who may have a different mortality risk pattern than the lower-income  
22 respondents we wish to analyze.  
23  
24  
25  
26  
27  
28  
29  
30  
31  
32

33  
34 All models use the NLMS person weights, which are divided and distributed among  
35 the person-years of the individual. The results of the models report the hazard ratios of  
36 mortality for deviations of each independent variable relative to the reference respondent  
37 person-year, which would be (a) at the mean age at person-year, (b) male (c) married, (d)  
38 white non-Hispanic, (e) with a high school diploma, (f) with the average (logged) family  
39 income, and (g) employed, with zero dollars received from Federal or state EITC.  
40  
41  
42  
43  
44  
45  
46  
47  
48  
49

## 50 Results

51  
52 Our analytic sample included 793,000 adults aged 18-64 from all 50 states and  
53 Washington D.C. Summary statistics for the analytic sample are presented in Table 2. Table  
54  
55  
56  
57  
58  
59  
60

1  
2  
3 shows the results of three Cox proportional hazards regressions. The functional form of,  
4  
5 and covariates within, all three regressions is the same. Only follow up differs (5-years, 10-  
6  
7 years, and maximum).  
8  
9

10 Our control variables show associations with mortality that are statistically  
11  
12 significant at  $p < 0.001$  and consistent with previous research.<sup>34</sup> For example, mortality risk  
13  
14 declines with income and employment but increases with age and Black or Native  
15  
16 American ethnicity (Table 3).  
17  
18

19 State EITC receipt is statistically-significant in all three models with a hazard ratio  
20  
21 (HR) = 0.97 (standard error [SE] = 0.01) for the 5-year and 10-year follow up models. For  
22  
23 maximum follow up, the HR = 0.98 (SE = 0.01).  
24  
25  
26  
27  
28

## 29 Discussion

30  
31 In this study, we examine the survival impact of state-level supplements to EITC  
32  
33 using a quasi-experimental design and individual-level data for 793,000 adults aged 18-64.  
34  
35 After adjusting for age, sex, race, education, family income, and employment status, we find  
36  
37 evidence for mortality benefits conferred by state-level supplemental EITC.  
38  
39

40  
41 It is difficult to precisely estimate the survival benefit associated with EITC because  
42  
43 the we were unable to quantify the number of years that any given participant was exposed  
44  
45 to the credit. Moreover, while quasi-experimental in nature, there could be state-level  
46  
47 factors that confound estimates (e.g., states with EITC supplementation may also offer  
48  
49 other social welfare programs, offer fewer worker protection regulations, or be more likely  
50  
51 to receive healthy migrants from other states). Over time, federal regulations has  
52  
53 disproportionately benefited poorer states that are less likely to implement supplemental  
54  
55  
56  
57  
58  
59  
60



1  
2  
3 EITC because these states have historically been high risk, low regulation. With these  
4  
5 limitations in mind, a hazard ratio of 0.97 over a 10-year period of follow-up corresponds  
6  
7 to an increase in life expectancy of roughly 2 weeks for every \$100 of state-level EITC  
8  
9 supplementation (in constant 2015 US dollars).<sup>43</sup> The results of a recent randomized-  
10  
11 controlled trial suggests that the average eligible recipient might receive hundreds of  
12  
13 dollars in benefits per year, suggesting that the program has the potential to meaningfully  
14  
15 improve population health.<sup>8</sup>  
16  
17

18  
19 Our study explores temporal and spatial variation in outcome measures across  
20  
21 states as well as dose-response effects across individuals. The NLMS affords a very large  
22  
23 sample size, long-term mortality follow-up, and information on EITC eligibility at the  
24  
25 individual level, providing a good deal of resolution relative to a previous study that  
26  
27 examined aggregate state-level effects.<sup>44</sup> Our study is generally consistent with previous  
28  
29 studies, which showed that, while EITC receipt may be a risk factor for obesity, overall  
30  
31 health and survival benefits have been noted <sup>26-32 38</sup>.  
32  
33

34  
35 While the EITC is an effective anti-poverty program, it tends to provide fairly  
36  
37 modest income support <sup>8</sup>. These modest program effects may be offset by the fact that the  
38  
39 vast majority of people who apply for EITC remain on EITC for many years <sup>45</sup>. The  
40  
41 cumulative effects the income support provided by EITC over the years may therefore add  
42  
43 up to survival benefits over time.  
44  
45

46  
47 Our findings are very important from a policy perspective. There is now reasonable  
48  
49 evidence that America's declining health and life expectancy are related to the declining  
50  
51 fortunes of lower- and middle-class families.<sup>46</sup> While some of the decline must be  
52  
53  
54  
55  
56  
57  
58  
59  
60

1  
2  
3 addressed with structural changes to the health system<sup>3</sup> and other anti-poverty policies,<sup>24</sup>  
4  
5 we find encouraging evidence that changes to tax policy might also help.  
6  
7  
8  
9  
10  
11  
12  
13  
14  
15  
16  
17  
18  
19  
20  
21  
22  
23  
24  
25  
26  
27  
28  
29  
30  
31  
32  
33  
34  
35  
36  
37  
38  
39  
40  
41  
42  
43  
44  
45  
46  
47  
48  
49  
50  
51  
52  
53  
54  
55  
56  
57  
58  
59  
60

### **Acknowledgments and Disclosures**

Any opinions and conclusions expressed herein are those of the authors and do not necessarily reflect the views of the U.S. Census Bureau. All results have been reviewed to ensure that no confidential information is disclosed. The statistical summaries reported in this document have been cleared by the Census Bureau's Disclosure Review Board release authorization number CBDRB-FY19-366.

### Contributorship statement

PM Conceived of the study and made significant contributions to the manuscript development. DV and JH led the direction and development of the methodological approach, and made

### *Competing interests*

None

### *Funding*

U.S. Department of Commerce, U.S. Census Bureau Number: CBDRB-FY19-366.

### *Data sharing statement*

Data contain identifiers and are not permissible for upload to public repository according to rules of the US Bureau of the Census

## References

1. Woolf SH, Schoomaker H. Life Expectancy and Mortality Rates in the United States, 1959-2017. *JAMA* 2019;322(20):1996-2016.
2. Muennig PA, Glied SA. What changes in survival rates tell us about us health care. *Health Aff (Millwood)* 2010;29(11):2105-13. doi: 10.1377/hlthaff.2010.0073
3. Polsky D, Grande D. The burden of health care costs for working families--implications for reform. *N Engl J Med* 2009;361(5):437-9. doi: 361/5/437 [pii] 10.1056/NEJMp0905297 [published Online First: 2009/07/31]
4. Adler NE, Stewart, J. Health disparities across the lifespan: Meaning, methods, and mechanisms. *Ann N Y Acad Sci* 2010;1186:5-23.
5. Hamad R, Rehkopf DH. Poverty and Child Development: A Longitudinal Study of the Impact of the Earned Income Tax Credit. *Am J Epidemiol* 2016;183(9):775-84. doi: 10.1093/aje/kwv317 [published Online First: 2016/04/09]
6. Haskins R, Margolis G. Show me the evidence: Obama's fight for rigor and results in social policy: Brookings Institution Press 2014.
7. Muennig P, Fiscella K, Tancredi D, et al. The relative health burden of selected social and behavioral risk factors in the United States: implications for policy. *Am J Public Health* 2010;100(9):1758-64. doi: 10.2105/AJPH.2009.165019
8. Paycheck Plus: Expanded Earned Income Tax Credit for Single Adults. Available online at: [https://www.mdrc.org/sites/default/files/PaycheckPlus\\_FinalReport.pdf](https://www.mdrc.org/sites/default/files/PaycheckPlus_FinalReport.pdf) Accessed: 8/22/19. [
9. Plescia M, Emmanuel C. Reducing Health Disparities by Addressing Social Determinants of Health The Mecklenburg County Experience. *N C Med J* 2014;75(6):417-21.
10. Kawachi I, Subramanian SV, Kim D. Social Capital and Health. New York: Springer 2010.

11. Sorlie PD, Rogot E. Mortality by employment status in the National Longitudinal Mortality Study. *Am J Epidemiol* 1990;132(5):983-92.
12. Rogot E, Sorlie PD, Johnson NJ. Life expectancy by employment status, income, and education in the National Longitudinal Mortality Study. *Public Health Rep* 1992;107(4):457-61.
13. McEwen BS, Mirsky AE. How socioeconomic status may "get under the skin" and affect the heart. *Eur Heart J* 2002;23(22):1727-8.
14. McEwen BS, Nasca C, Gray JD. Stress effects on neuronal structure: hippocampus, amygdala, and prefrontal cortex. *Neuropsychopharmacology* 2016;41(1):3.
15. Sapolsky RM, Krey LC, McEwen BS. Prolonged glucocorticoid exposure reduces hippocampal neuron number: implications for aging. *J Neurosci* 1985;5(5):1222-7.
16. Seeman T, Epel E, Gruenewald T, et al. Socio - economic differentials in peripheral biology: Cumulative allostatic load. *Ann N Y Acad Sci* 2010;1186(1):223-39.
17. Fredrickson BL, Grewen KM, Coffey KA, et al. A functional genomic perspective on human well-being. *Proceedings of the National Academy of Sciences* 2013;110(33):13684-89.
18. McEwen BS. Protective and damaging effects of stress mediators. *N Engl J Med* 1998;338(3):171-9.
19. Roy M, Sapolsky RM. The exacerbation of hippocampal excitotoxicity by glucocorticoids is not mediated by apoptosis. *Neuroendocrinology* 2003;77(1):24-31.
20. Sapolsky RM, Krey LC, McEwen BS. The neuroendocrinology of stress and aging: the glucocorticoid cascade hypothesis. *Endocr Rev* 1986;7(3):284-301.
21. Despard M, Perantie D, Oliphant J, et al. Do EITC recipients use tax refunds to get ahead? New evidence from refund to savings. *CSD research brief* 2015(15-38)
22. Sykes J, Križ K, Edin K, et al. Dignity and dreams: What the Earned Income Tax Credit (EITC) means to low-income families. *Am Sociol Rev* 2015;80(2):243-67.
23. Seeman TE, McEwen BS, Rowe JW, et al. Allostatic load as a marker of cumulative biological risk: MacArthur studies of successful aging. *Proc Natl Acad Sci U S A* 2001;98(8):4770-5.
24. Courtin E, Kim S, Song S, et al. Can Social Policies Improve Health? A Systematic Review and Meta-Analysis of 38 Randomized Trials. Accepted at *Milbank Quarterly*. In Press. 2020
25. Santiago CD, Wadsworth ME, Stump J. Socioeconomic status, neighborhood disadvantage, and poverty-related stress: Prospective effects on psychological syndromes among diverse low-income families. *J Econ Psychol* 2011;32(2):218-30.
26. Rehkopf DH, Strully KW, Dow WH. The short-term impacts of Earned Income Tax Credit disbursement on health. *Int J Epidemiol* 2014;43(6):1884-94. doi: 10.1093/ije/dyu172 [published Online First: 2014/08/31]
27. Averett S, Wang Y. The effects of Earned Income Tax Credit payment expansion on maternal smoking. *Health Econ* 2013;22(11):1344-59. doi: 10.1002/hec.2886 [published Online First: 2012/12/15]
28. Cowan B, Tefft N. Education, Maternal Smoking, and the Earned Income Tax Credit. *The BE Journal of Economic Analysis & Policy* 2012;12(1):39.

- 1  
2  
3  
4  
5  
6  
7  
8  
9  
10  
11  
12  
13  
14  
15  
16  
17  
18  
19  
20  
21  
22  
23  
24  
25  
26  
27  
28  
29  
30  
31  
32  
33  
34  
35  
36  
37  
38  
39  
40  
41  
42  
43  
44  
45  
46  
47  
48  
49  
50  
51  
52  
53  
54  
55  
56  
57  
58  
59  
60
29. Larrimore J. Does a higher income have positive health effects? Using the earned income tax credit to explore the income-health gradient. *Milbank Q* 2011;89(4):694-727. doi: 10.1111/j.1468-0009.2011.00647.x [published Online First: 2011/12/23]
  30. Strully KW, Rehkopf DH, Xuan Z. Effects of Prenatal Poverty on Infant Health: State Earned Income Tax Credits and Birth Weight. *Am Sociol Rev* 2010;75(4):534-62. doi: 10.1177/0003122410374086 [published Online First: 2011/06/07]
  31. Schmeiser MD. Expanding wallets and waistlines: the impact of family income on the BMI of women and men eligible for the Earned Income Tax Credit. *Health Econ* 2009;18(11):1277-94. doi: 10.1002/hec.1430 [published Online First: 2009/01/15]
  32. Wicks-Lim J, Arno PS. Improving population health by reducing poverty: New York's Earned Income Tax Credit. *SSM Popul Health* 2017;3:373-81. doi: 10.1016/j.ssmph.2017.03.006 [published Online First: 2018/01/20]
  33. Muennig PA, Mohit B, Wu J, et al. Cost Effectiveness of the Earned Income Tax Credit as a Health Policy Investment. *American journal of preventive medicine* 2016;51(6):874-81. doi: 10.1016/j.amepre.2016.07.001 [published Online First: 2016/09/12]
  34. Sorlie PD, Backlund E, Keller JB. US mortality by economic, demographic, and social characteristics: the National Longitudinal Mortality Study. *Am J Public Health* 1995;85(7):949-56.
  35. Preston SH, Elo IT. Anatomy of a Municipal Triumph: New York City's Upsurge in Life Expectancy. *Population and Development Review* 2013;40(1):1-29.
  36. Muennig P, Masters R, Vail D, et al. The effects of New York City's coordinated public health programmes on mortality through 2011. *Int J Epidemiol* 2017;46(4):1239-48. doi: 10.1093/ije/dyw290
  37. Muennig P. Health selection vs. causation in the income gradient: what can we learn from graphical trends? *J Health Care Poor Underserved* 2008;19(2):574-9. doi: 10.1353/hpu.0.0018
  38. Hamad R, Rehkopf DH. Poverty, Pregnancy, and Birth Outcomes: A Study of the Earned Income Tax Credit. *Paediatr Perinat Epidemiol* 2015;29(5):444-52. doi: 10.1111/ppe.12211 [published Online First: 2015/07/28]
  39. United States Census Bureau. NLMS Public-Use Reference Manual. Available online at: <https://www.google.com/search?client=safari&rls=en&q=NLMS+Public-Use+Reference+Manual.&ie=UTF-8&oe=UTF-8>. Accessed 1/7/2020. [Available from: [https://www.census.gov/did/www/nlms/publications/docs/referenceManual\\_v4.pdf](https://www.census.gov/did/www/nlms/publications/docs/referenceManual_v4.pdf) accessed 12/15/2018.
  40. Feenberg D, Coutts E. An Introduction to the TAXSIM Model. *J Policy Anal Manage* 1993;12(1):189-94. doi: 10.2307/3325474
  41. Feenberg D. TAXSIM: State EITC provisions 1977-2016 [Available from: <http://users.nber.org/~taxsim/state-eitc.html>. accessed 12/15/2018.
  42. Feenberg D. Minnesota Working Family Credit Table 2018 [Available from: [http://users.nber.org/~taxsim/eitc\\_MN.pdf](http://users.nber.org/~taxsim/eitc_MN.pdf).
  43. Muennig PA, Gold MR. Using the years-of-healthy-life measure to calculate QALYs. *Am J Prev Med* 2001;20(1):35-9.
  44. Muennig PA, Mohit B, Wu J, et al. Cost Effectiveness of the Earned Income Tax Credit as a Health Policy Investment. *Am J Prev Med* 2016 doi: 10.1016/j.amepre.2016.07.001

- 1  
2  
3 45. Grogger J. Welfare transitions in the 1990s: The economy, welfare policy, and the EITC. *J*  
4 *Policy Anal Manage* 2004;23(4):671-95.  
5  
6 46. Muennig PA, Reynolds M, Fink DS, et al. America's Declining Well-Being, Health, and Life  
7 Expectancy: Not Just a White Problem. *Am J Public Health* 2018;108(12):1626-31.  
8 doi: 10.2105/AJPH.2018.304585 [published Online First: 2018/09/27]  
9  
10

11  
12 Table 1. The Supplemental Earned Income Tax Credit (EITC) benefit by state and  
13 the year enacted.\*

| State                | Year Enacted | Percent Addition to Federal EITC |
|----------------------|--------------|----------------------------------|
| California           | 2015†        | 85                               |
| Colorado             | 1999, 2013†  | 10                               |
| Connecticut          | 2011         | 30                               |
| Delaware             | 2005         | 20                               |
| District of Columbia | 2000         | 40                               |
| Illinois             | 2000         | 10                               |
| Indiana              | 1999         | 9                                |
| Iowa                 | 1989         | 15                               |
| Kansas               | 1998         | 17                               |
| Louisiana            | 2007         | 3.5                              |
| Maine                | 2000         | 5                                |
| Maryland             | 1987         | 25.5                             |
| Massachusetts        | 1997         | 23                               |
| Michigan             | 2006         | 6                                |
| Minnesota            | 1991         | 35                               |
| Nebraska             | 2006         | 10                               |
| New Jersey           | 2000         | 30                               |
| New Mexico           | 2007         | 10                               |
| New York             | 1994         | 30                               |
| Ohio                 | 2013†        | 10                               |
| Oklahoma             | 2002         | 5                                |
| Oregon               | 1997         | 8                                |
| Rhode Island         | 1986         | 12.5                             |
| Vermont              | 1988         | 32                               |
| Virginia             | 2004         | 20                               |
| Washington           | 2000         | 10                               |
| Wisconsin            | 1989         | 11                               |

51 \*Details of implementation and variability by family size and year available from TAXSIM<sup>24-</sup>  
52 25

54 †Not included in analysis as having supplemental EITC because program implementation  
55 was after the period of our mortality follow-up.  
56  
57  
58  
59  
60

1  
2  
3  
4  
5  
6  
7  
8  
9  
10  
11  
12  
13  
14  
15  
16  
17  
18  
19  
20  
21  
22  
23  
24  
25  
26  
27  
28  
29  
30  
31  
32  
33  
34  
35  
36  
37  
38  
39  
40  
41  
42  
43  
44  
45  
46  
47  
48  
49  
50  
51  
52  
53  
54  
55  
56  
57  
58  
59  
60

For peer review only



Table 2: Descriptive statistics for lower-income adult person-years (ages 18-64 at initial interview) in the National Longitudinal Mortality Survey (NLMS), 1986-2011. (United States Bureau of the Census approval DRB approval number CBDRB-FY19-366.)

| Variable                                                                           | Maximum follow up <sup>1</sup> |                  | 10-year follow up <sup>1</sup> |                  | 5-year follow-up <sup>1</sup> |                  |
|------------------------------------------------------------------------------------|--------------------------------|------------------|--------------------------------|------------------|-------------------------------|------------------|
|                                                                                    | Mean                           | (SD(x))<br>SE(p) | Mean                           | (SD(x))<br>SE(p) | Mean                          | (SD(x))<br>SE(p) |
| Age at person-year                                                                 | 43.2                           | (13.5)           | 41.6                           | (13.2)           | 40.5                          | (13.2)           |
| Female (%)                                                                         | 52.5                           | 0.03             | 52.2                           | 0.03             | 52.0                          | 0.05             |
| Married at interview (%)                                                           | 47.5                           | 0.03             | 46.5                           | 0.03             | 45.8                          | 0.04             |
| Race/ethnicity:                                                                    |                                |                  |                                |                  |                               |                  |
| Hispanic (%)                                                                       | 15.1                           | 0.02             | 15.9                           | 0.02             | 16.5                          | 0.03             |
| White (%)                                                                          | 65.5                           | 0.03             | 64.3                           | 0.03             | 63.5                          | 0.04             |
| Black (%)                                                                          | 15.1                           | 0.02             | 15.2                           | 0.02             | 15.3                          | 0.03             |
| Native American (%)                                                                | 0.87                           | 0.004            | 0.88                           | 0.005            | 0.86                          | 0.007            |
| Asian/ Pacific Islander (%)                                                        | 3.5                            | 0.010            | 3.7                            | 0.013            | 3.8                           | 0.016            |
| Highest educational attainment at time of interview:                               |                                |                  |                                |                  |                               |                  |
| No high school diploma (%)                                                         | 20.1                           | 0.02             | 19.8                           | 0.03             | 19.3                          | 0.03             |
| High school diploma (%)                                                            | 37.7                           | 0.03             | 37.0                           | 0.03             | 36.5                          | 0.04             |
| Some college education (%)                                                         | 26.6                           | 0.03             | 27.3                           | 0.03             | 27.7                          | 0.04             |
| College degree or higher (%)                                                       | 15.6                           | 0.02             | 16.0                           | 0.03             | 16.4                          | 0.03             |
| Family income at time of interview \$2015; (mean, SD)                              | 40,500                         | (22,500)         | 40,000                         | (22,500)         | 39,500                        | (22,500)         |
| Family income, \$2015 (as natural log. of income at time of interview; mean, (SD)) | 10.2                           | (1.8)            | 10.1                           | (1.8)            | 10.1                          | (1.9)            |
| Employment status at time of interview:                                            |                                |                  |                                |                  |                               |                  |

|                                                                    |           |        |           |        |           |        |
|--------------------------------------------------------------------|-----------|--------|-----------|--------|-----------|--------|
| Employed                                                           | 68.0      | 0.03   | 67.6      | 0.03   | 66.9      | 0.04   |
| Unemployed                                                         | 11.2      | 0.02   | 11.9      | 0.03   | 12.7      | 0.03   |
| Not in labor force                                                 | 20.8      | 0.02   | 20.5      | 0.03   | 20.4      | 0.04   |
| Receiving State EITC (%) <sup>1</sup>                              | 27.8      | 0.03   | 27.2      | 0.03   | 27.3      | 0.04   |
| Federal EITC receipts<br>(in \$100 units; mean, (SD)) <sup>1</sup> | 14.8      | (13.0) | 15.9      | (14.1) | 16.3      | (14.5) |
| State EITC receipts<br>(in \$100 units; mean (SD)) <sup>1</sup>    | 3.26      | (4.06) | 3.29      | (4.13) | 3.32      | (4.18) |
|                                                                    |           |        |           |        |           |        |
| Sample size (person-years) <sup>2</sup>                            | 8,820,000 |        | 5,960,000 |        | 3,530,000 |        |
| Sample size (respondents) <sup>2</sup>                             | 793,000   |        | 793,000   |        | 793,000   |        |
| Number of deaths <sup>2</sup>                                      | 48,000    |        | 24,000    |        | 12,000    |        |

Note: results weighted to be representative of the 0-64 U.S. population in 2015.

<sup>1</sup>SD = standard deviation; SE = standard error; EITC = Earned Income Tax Credit.

For Tmax: Conditional means for <fed\_eitc> on 2,250,000 PY (206,000 persons), conditional means for <st\_eitc> on 281,000 PY (42,500 persons). [Correlation is 0.285 among Fed. EITC recipients.]

For T10: Conditional means for <fed\_eitc> on 1,540,000 PY (206,000 persons), conditional means for <st\_eitc> on 246,000 PY (42,500 persons). [Correlation is 0.291 among <fed\_eitc> recipients.]

For T05: Conditional means for <fed\_eitc> on 912,000 PY (206,000 persons), conditional means for <st\_eitc> on 168,000 PY (42,500 persons). [Correlation is 0.301 among <fed\_eitc> recipients.]

<sup>2</sup>Sample counts are rounded according to the U.S. Census Bureau Disclosure Review Board Disclosure Avoidance Guidelines.

1  
2  
3  
4  
5  
6  
7  
8  
9  
10  
11  
12  
13  
14  
15  
16  
17  
18  
19  
20  
21  
22  
23  
24  
25  
26  
27  
28  
29  
30  
31  
32  
33  
34  
35  
36  
37  
38  
39  
40  
41  
42  
43  
44  
45  
46  
47

For peer review only

Table 3: Cox proportional hazard models of supplemental EITC's impact on mortality risk for lower-income adults for adult person-years (ages 18-64) in the NLMS, 1986-2011. (United States Bureau of the Census approval DRB approval number CBDRB-FY19-366.)

| Variable                                                                               | Maximum follow-up |         | 10-year follow-up               |         | 5-year follow-up                |         |
|----------------------------------------------------------------------------------------|-------------------|---------|---------------------------------|---------|---------------------------------|---------|
|                                                                                        | Hazard ratio      | SE (HR) | Hazard ratio                    | SE (HR) | Hazard ratio                    | SE (HR) |
| Age at person-year (years)                                                             | 1.07***           | 0.0008  | 1.07***                         | 0.0009  | 1.06***                         | 0.0011  |
| Female                                                                                 | 0.595***          | 0.010   | 0.593*<br>**                    | 0.012   | 0.586*<br>**                    | 0.014   |
| Married at time of interview                                                           | 0.692***          | 0.012   | 0.685*<br>**                    | 0.014   | 0.686*<br>**                    | 0.017   |
| Race/ethnicity (White, non-Hispanic is referent):                                      |                   |         |                                 |         |                                 |         |
| Hispanic                                                                               | 0.588***          | 0.020   | 0.590*<br>**                    | 0.023   | 0.600*<br>**                    | 0.029   |
| Black                                                                                  | 1.09**            | 0.025   | 1.09***                         | 0.028   | 1.09*                           | 0.035   |
| Native American                                                                        | 1.26***           | 0.087   | 1.28**                          | 0.100   | 1.30**                          | 0.123   |
| Asian/ Pacific Islander                                                                | 0.578***          | 0.038   | 0.579*<br>**                    | 0.043   | 0.580*<br>**                    | 0.052   |
| Highest educational attainment at time of interview (High school diploma is referent): |                   |         |                                 |         |                                 |         |
| No high school diploma                                                                 | 1.11***           | 0.022   | 1.09***                         | 0.025   | 1.07*                           | 0.031   |
| Some college education                                                                 | 0.889***          | 0.020   | 0.887*<br>**                    | 0.023   | 0.884*<br>**                    | 0.029   |
| College degree or higher                                                               | 0.701***          | 0.022   | 0.713*<br>**                    | 0.026   | 0.729*<br>**                    | 0.033   |
| Family income, 2015 dollars (as natural log. of income at time of interview)           | 0.986***          | 0.005   | 0.988*                          | 0.005   | 0.989 <sup>N</sup> <sub>s</sub> | 0.006   |
| Employment status at time of interview (Employed is referent):                         |                   |         |                                 |         |                                 |         |
| Unemployed                                                                             | 3.20***           | 0.071   | 3.47***                         | 0.088   | 3.78***                         | 0.117   |
| Not in labor force                                                                     | 1.79***           | 0.035   | 1.91***                         | 0.046   | 2.03***                         | 0.063   |
| Earned Income Tax Credit (EITC):                                                       |                   |         |                                 |         |                                 |         |
| Federal EITC (in \$100 units of 2015\$)                                                | 1.003*            | 0.0011  | 1.002 <sup>N</sup> <sub>s</sub> | 0.0012  | 1.002 <sup>N</sup> <sub>s</sub> | 0.0015  |
| State EITC (in \$100 units of 2015\$)                                                  | 0.979*            | 0.010   | 0.973*                          | 0.011   | 0.968*                          | 0.014   |
| Sample size (N=person-years) <sup>1</sup>                                              |                   |         |                                 |         |                                 |         |
|                                                                                        | 8,820,000         |         | 5,960,000                       |         | 3,530,000                       |         |

- 1
- 2 All three Cox proportional hazard models include state fixed-effects corrections
- 3 (state HRs not shown), and time-trends based on the year of the respondent's ACS
- 4 interview.

1  
2  
3  
4  
5  
6  
7  
8  
9  
10  
11  
12  
13  
14  
15  
16  
17  
18  
19  
20  
21  
22  
23  
24  
25  
26  
27  
28  
29  
30  
31  
32  
33  
34  
35  
36  
37  
38  
39  
40  
41  
42  
43  
44  
45  
46  
47  
48  
49  
50  
51  
52  
53  
54  
55  
56  
57  
58  
59  
60

\* p<0.05, \*\* p<0.01, \*\*\* p<0.001  
<sup>1</sup> Sample counts are rounded according to the U.S. Census Bureau Disclosure Review Board Disclosure Avoidance Guidelines. All models included N=793,000 respondents.  
<sup>NS</sup> Not statistically significant at p ≤ 0.05.

For peer review only

## STROBE Statement—checklist of items that should be included in reports of observational studies

|                              | Item No                                                                                                                                                                                                                                                                                                   | Recommendation                                                                                                                                                                                                                                                                                                                                                                                                                                                         | Page No |
|------------------------------|-----------------------------------------------------------------------------------------------------------------------------------------------------------------------------------------------------------------------------------------------------------------------------------------------------------|------------------------------------------------------------------------------------------------------------------------------------------------------------------------------------------------------------------------------------------------------------------------------------------------------------------------------------------------------------------------------------------------------------------------------------------------------------------------|---------|
| <b>Title and abstract</b>    | 1                                                                                                                                                                                                                                                                                                         | (a) Indicate the study's design with a commonly used term in the title or the abstract                                                                                                                                                                                                                                                                                                                                                                                 | 1       |
|                              |                                                                                                                                                                                                                                                                                                           | (b) Provide in the abstract an informative and balanced summary of what was done and what was found                                                                                                                                                                                                                                                                                                                                                                    | 2       |
| <b>Introduction</b>          |                                                                                                                                                                                                                                                                                                           |                                                                                                                                                                                                                                                                                                                                                                                                                                                                        |         |
| Background/rationale         | 2                                                                                                                                                                                                                                                                                                         | Explain the scientific background and rationale for the investigation being reported                                                                                                                                                                                                                                                                                                                                                                                   | 3       |
| Objectives                   | 3                                                                                                                                                                                                                                                                                                         | State specific objectives, including any prespecified hypotheses                                                                                                                                                                                                                                                                                                                                                                                                       | 3       |
| <b>Methods</b>               |                                                                                                                                                                                                                                                                                                           |                                                                                                                                                                                                                                                                                                                                                                                                                                                                        |         |
| Study design                 | 4                                                                                                                                                                                                                                                                                                         | Present key elements of study design early in the paper                                                                                                                                                                                                                                                                                                                                                                                                                | 5       |
| Setting                      | 5                                                                                                                                                                                                                                                                                                         | Describe the setting, locations, and relevant dates, including periods of recruitment, exposure, follow-up, and data collection                                                                                                                                                                                                                                                                                                                                        | 5       |
| Participants                 | 6                                                                                                                                                                                                                                                                                                         | (a) <i>Cohort study</i> —Give the eligibility criteria, and the sources and methods of selection of participants. Describe methods of follow-up<br><i>Case-control study</i> —Give the eligibility criteria, and the sources and methods of case ascertainment and control selection. Give the rationale for the choice of cases and controls<br><i>Cross-sectional study</i> —Give the eligibility criteria, and the sources and methods of selection of participants | 5       |
|                              |                                                                                                                                                                                                                                                                                                           | (b) <i>Cohort study</i> —For matched studies, give matching criteria and number of exposed and unexposed<br><i>Case-control study</i> —For matched studies, give matching criteria and the number of controls per case                                                                                                                                                                                                                                                 | NA      |
| Variables                    | 7                                                                                                                                                                                                                                                                                                         | Clearly define all outcomes, exposures, predictors, potential confounders, and effect modifiers. Give diagnostic criteria, if applicable                                                                                                                                                                                                                                                                                                                               | 6       |
| Data sources/<br>measurement | 8*                                                                                                                                                                                                                                                                                                        | For each variable of interest, give sources of data and details of methods of assessment (measurement). Describe comparability of assessment methods if there is more than one group                                                                                                                                                                                                                                                                                   | 7       |
| Bias                         | 9                                                                                                                                                                                                                                                                                                         | Describe any efforts to address potential sources of bias                                                                                                                                                                                                                                                                                                                                                                                                              | 11      |
| Study size                   | 10                                                                                                                                                                                                                                                                                                        | Explain how the study size was arrived at                                                                                                                                                                                                                                                                                                                                                                                                                              |         |
| Quantitative variables       | 11                                                                                                                                                                                                                                                                                                        | Explain how quantitative variables were handled in the analyses. If applicable, describe which groupings were chosen and why                                                                                                                                                                                                                                                                                                                                           | 6       |
| Statistical methods          | 12                                                                                                                                                                                                                                                                                                        | (a) Describe all statistical methods, including those used to control for confounding                                                                                                                                                                                                                                                                                                                                                                                  | 7       |
|                              |                                                                                                                                                                                                                                                                                                           | (b) Describe any methods used to examine subgroups and interactions                                                                                                                                                                                                                                                                                                                                                                                                    | NA      |
|                              | (c) Explain how missing data were addressed                                                                                                                                                                                                                                                               | 4                                                                                                                                                                                                                                                                                                                                                                                                                                                                      |         |
|                              | (d) <i>Cohort study</i> —If applicable, explain how loss to follow-up was addressed<br><i>Case-control study</i> —If applicable, explain how matching of cases and controls was addressed<br><i>Cross-sectional study</i> —If applicable, describe analytical methods taking account of sampling strategy | 6                                                                                                                                                                                                                                                                                                                                                                                                                                                                      |         |
|                              | (e) Describe any sensitivity analyses                                                                                                                                                                                                                                                                     |                                                                                                                                                                                                                                                                                                                                                                                                                                                                        |         |

Continued on next page

1  
2  
3  
4  
5  
6  
7  
8  
9  
10  
11  
12  
13  
14  
15  
16  
17  
18  
19  
20  
21  
22  
23  
24  
25  
26  
27  
28  
29  
30  
31  
32  
33  
34  
35  
36  
37  
38  
39  
40  
41  
42  
43  
44  
45  
46  
47  
48  
49  
50  
51  
52  
53  
54  
55  
56  
57  
58  
59  
60**Results**

|                  |     |                                                                                                                                                                                                              |    |
|------------------|-----|--------------------------------------------------------------------------------------------------------------------------------------------------------------------------------------------------------------|----|
| Participants     | 13* | (a) Report numbers of individuals at each stage of study—eg numbers potentially eligible, examined for eligibility, confirmed eligible, included in the study, completing follow-up, and analysed            | 4  |
|                  |     | (b) Give reasons for non-participation at each stage                                                                                                                                                         | NA |
|                  |     | (c) Consider use of a flow diagram                                                                                                                                                                           | NA |
| Descriptive data | 14* | (a) Give characteristics of study participants (eg demographic, clinical, social) and information on exposures and potential confounders                                                                     | 6  |
|                  |     | (b) Indicate number of participants with missing data for each variable of interest                                                                                                                          | NA |
|                  |     | (c) <i>Cohort study</i> —Summarise follow-up time (eg, average and total amount)                                                                                                                             | 7  |
| Outcome data     | 15* | <i>Cohort study</i> —Report numbers of outcome events or summary measures over time                                                                                                                          | 10 |
|                  |     | <i>Case-control study</i> —Report numbers in each exposure category, or summary measures of exposure                                                                                                         | NA |
|                  |     | <i>Cross-sectional study</i> —Report numbers of outcome events or summary measures                                                                                                                           | NA |
| Main results     | 16  | (a) Give unadjusted estimates and, if applicable, confounder-adjusted estimates and their precision (eg, 95% confidence interval). Make clear which confounders were adjusted for and why they were included | 10 |
|                  |     | (b) Report category boundaries when continuous variables were categorized                                                                                                                                    | NA |
|                  |     | (c) If relevant, consider translating estimates of relative risk into absolute risk for a meaningful time period                                                                                             | NA |
| Other analyses   | 17  | Report other analyses done—eg analyses of subgroups and interactions, and sensitivity analyses                                                                                                               | NA |

**Discussion**

|                  |    |                                                                                                                                                                            |    |
|------------------|----|----------------------------------------------------------------------------------------------------------------------------------------------------------------------------|----|
| Key results      | 18 | Summarise key results with reference to study objectives                                                                                                                   | 14 |
| Limitations      | 19 | Discuss limitations of the study, taking into account sources of potential bias or imprecision. Discuss both direction and magnitude of any potential bias                 | 15 |
| Interpretation   | 20 | Give a cautious overall interpretation of results considering objectives, limitations, multiplicity of analyses, results from similar studies, and other relevant evidence | 13 |
| Generalisability | 21 | Discuss the generalisability (external validity) of the study results                                                                                                      | 11 |

**Other information**

|         |    |                                                                                                                                                               |    |
|---------|----|---------------------------------------------------------------------------------------------------------------------------------------------------------------|----|
| Funding | 22 | Give the source of funding and the role of the funders for the present study and, if applicable, for the original study on which the present article is based | 15 |
|---------|----|---------------------------------------------------------------------------------------------------------------------------------------------------------------|----|

\*Give information separately for cases and controls in case-control studies and, if applicable, for exposed and unexposed groups in cohort and cross-sectional studies.

**Note:** An Explanation and Elaboration article discusses each checklist item and gives methodological background and published examples of transparent reporting. The STROBE checklist is best used in conjunction with this article (freely available on the Web sites of PLoS Medicine at <http://www.plosmedicine.org/>, Annals of Internal Medicine at <http://www.annals.org/>, and Epidemiology at <http://www.epidem.com/>). Information on the STROBE Initiative is available at [www.strobe-statement.org](http://www.strobe-statement.org).

# BMJ Open

## Can Antipoverty Programs Save Lives? Quasi-experimental evidence from the Earned Income Tax Credit in the United States

|                                 |                                                                                                            |
|---------------------------------|------------------------------------------------------------------------------------------------------------|
| Journal:                        | <i>BMJ Open</i>                                                                                            |
| Manuscript ID                   | bmjopen-2020-037051.R1                                                                                     |
| Article Type:                   | Original research                                                                                          |
| Date Submitted by the Author:   | 10-Jun-2020                                                                                                |
| Complete List of Authors:       | Muennig, Peter; Columbia University, Vail, Daniel; Stanford University Hakes, Jahn; U.S. Bureau of Census, |
| <b>Primary Subject Heading</b>: | Health policy                                                                                              |
| Secondary Subject Heading:      | Public health, Health economics                                                                            |
| Keywords:                       | PUBLIC HEALTH, Health policy < HEALTH SERVICES ADMINISTRATION & MANAGEMENT, SOCIAL MEDICINE                |
|                                 |                                                                                                            |

SCHOLARONE™  
Manuscripts





I, the Submitting Author has the right to grant and does grant on behalf of all authors of the Work (as defined in the below author licence), an exclusive licence and/or a non-exclusive licence for contributions from authors who are: i) UK Crown employees; ii) where BMJ has agreed a CC-BY licence shall apply, and/or iii) in accordance with the terms applicable for US Federal Government officers or employees acting as part of their official duties; on a worldwide, perpetual, irrevocable, royalty-free basis to BMJ Publishing Group Ltd ("BMJ") its licensees and where the relevant Journal is co-owned by BMJ to the co-owners of the Journal, to publish the Work in this journal and any other BMJ products and to exploit all rights, as set out in our [licence](#).

The Submitting Author accepts and understands that any supply made under these terms is made by BMJ to the Submitting Author unless you are acting as an employee on behalf of your employer or a postgraduate student of an affiliated institution which is paying any applicable article publishing charge ("APC") for Open Access articles. Where the Submitting Author wishes to make the Work available on an Open Access basis (and intends to pay the relevant APC), the terms of reuse of such Open Access shall be governed by a Creative Commons licence – details of these licences and which [Creative Commons](#) licence will apply to this Work are set out in our licence referred to above.

Other than as permitted in any relevant BMJ Author's Self Archiving Policies, I confirm this Work has not been accepted for publication elsewhere, is not being considered for publication elsewhere and does not duplicate material already published. I confirm all authors consent to publication of this Work and authorise the granting of this licence.

1  
2  
3 Can Antipoverty Programs Save Lives? Quasi-experimental evidence from the Earned  
4 Income Tax Credit in the United States  
5  
6  
7  
8  
9

10 Peter Muennig, M.D., M.P.H.<sup>1</sup>; Daniel Vail, MD.<sup>2</sup>; Jahn K. Hakes, Ph.D.<sup>3</sup>

11  
12 <sup>1</sup> Mailman School of Public Health at Columbia University, Health Policy and Management  
13

14  
15 <sup>2</sup> Stanford University School of Medicine  
16

17 <sup>3</sup> US Bureau of the Census  
18  
19  
20  
21

22 Corresponding Author  
23

24 Peter Muennig, MD, MPH  
25

26 Professor  
27

28 Mailman School of Public Health  
29

30 Columbia University  
31

32 722 West 168th St.  
33

34 ARB 4th Floor  
35

36 New York, NY 10032  
37

38 347-533-3415  
39

40 Pm124@columbia.edu  
41  
42  
43  
44  
45  
46  
47

48 Keywords: Earned Income Tax Credit; Quasi-Experimental Studies; Social Determinants of  
49 Health  
50  
51

52  
53 Word Count: 3,449  
54  
55  
56  
57  
58  
59  
60

1  
2  
3  
4  
5  
6  
7  
8  
9  
10  
11  
12  
13  
14  
15  
16  
17  
18  
19  
20  
21  
22  
23  
24  
25  
26  
27  
28  
29  
30  
31  
32  
33  
34  
35  
36  
37  
38  
39  
40  
41  
42  
43  
44  
45  
46  
47  
48  
49  
50  
51  
52  
53  
54  
55  
56  
57  
58  
59  
60

Disclaimer: This paper is released to inform interested parties of research and to encourage discussion. Any views expressed on statistical, methodological, technical, or operational issues are those of the authors and not necessarily those of the U.S. Census Bureau.

For peer review only

## Abstract

**Objective:** To estimate the impact of state-level supplements of the Earned Income Tax Credit (EITC) on mortality in the United States. The EITC supplements the wages of lower-income workers by providing larger returns when taxes are filed.

**Setting:** Nationwide sample spanning 25 cohorts of people across every state in the United States

**Participants:** 793,000 respondents within the National Longitudinal Mortality Survey (NLMS) between 1986-2011, a representative sample of the United States.

**Intervention:** State-level supplementation to the EITC program. Some, but not all, states added EITC supplementation to varying degrees beginning in 1986 (Wisconsin) and most recently in 2015 (California). Participants who were eligible in states with supplementary programs were compared with those who were not eligible for supplementation. Comparisons were made both before and after implementation of the supplementary program (a difference-in-difference, intent-to-treat analysis). This quasi-experimental approach further controls for age, gender, marital status, race or ethnicity, educational attainment, income, and employment status.

**Primary and secondary outcome measure:** the primary outcome measure was survival at 10 years. Secondary outcome measures included survival at 5 years and survival to the end of the intervention period.

**Results:** We find an association between state supplemental EITC and survival, with a hazard ratio of 0.97 (95% confidence interval = 0.951-0.996) for each \$100 of EITC increase ( $p < 0.05$ ). **Conclusion:** State-level supplemental EITC may be an effective means of increasing survival in the US.

1  
2  
3  
4  
5  
6  
7 **Strengths and limitations of this study**

- 8 • Quasi-experimental design (difference-in-difference with intent-to-treat)
  - 9 • Utilizes the largest health dataset in the United States
  - 10 • Able to study individual-level impacts on mortality over many decades
  - 11 • Uses a powerful identification strategy
  - 12 • States that experience increases in wealth may also invest in social policies
- 13  
14  
15  
16  
17  
18  
19  
20  
21  
22  
23  
24  
25  
26  
27  
28  
29  
30  
31  
32  
33  
34  
35  
36  
37  
38  
39  
40  
41  
42  
43  
44  
45  
46  
47  
48  
49  
50  
51  
52  
53  
54  
55  
56  
57  
58  
59  
60

For peer review only

## Introduction

In the US life expectancy has declined relative to other nations for decades as lower wages and higher health costs have reduced disposable income for households below the US median for earnings<sup>1-3</sup>. One policy that has promise to address declining income, and potentially declining health, is the Earned Income Tax Credit (EITC). The EITC is designed to supplement earnings in lower-paying jobs by providing a monetary credit to low-income workers who file taxes. This program has the effect of restoring some of the disposable income lost to lower-income households as high paying factory jobs have disappeared in the United States, thereby potentially also restoring health<sup>4</sup>.

The EITC is the largest means-tested anti-poverty program in the United States<sup>5</sup>. Historically it has received broad bipartisan support, having been created under President Ford in 1975, and subsequently expanded during the terms of Presidents Clinton, Bush, and Obama<sup>6</sup>.

Poverty is associated with a greater burden of disease than smoking and obesity combined in the US<sup>7 8</sup>. Poverty takes a toll on health by increasing one's risk of environmental exposures (e.g., living near freeway intersections or living in housing with peeling lead paint) and reducing purchasing power (e.g., of healthy food or out-of-pocket medical expenses)<sup>4</sup>. Likewise, EITC can increase employment, which is also associated with decreased mortality (possibly because it can increase access to employer-based health insurance, health savings accounts, and social capital)<sup>9-12</sup>. However, the largest health effects associated with EITC are now believed to arise from incremental changes in psychological stress, which causes the release of glucocorticoids that damage neural

1  
2  
3 structures associated with executive function, memory, and homeostatic processes, such as  
4  
5 the regulation of blood sugar and blood pressure.<sup>10 13-18</sup>  
6  
7

8       Glucocorticoids are meant to increase survival among our hunter-gatherer  
9  
10 ancestors by diverting glucose and oxygen from the brain and reproductive organs to  
11  
12 muscles, allowing us to flee predators.<sup>19 20</sup> Modern-day society, unfortunately, is filled with  
13  
14 stressors that activate these primitive, neurotoxic systems, leading to hypertension,  
15  
16 obesity, and interfering with health behaviors.<sup>18</sup>  
17  
18

19       Notably, even small increases in income support among low-income households can  
20  
21 lead to increased short-term perceived financial security even if the gains are too small to  
22  
23 increase savings (and therefore demonstrable financial security).<sup>10 21 22</sup> Financial security  
24  
25 may be one of the most important determinants of stress among low-income households.<sup>16</sup>  
26  
27 <sup>23-26</sup>. By alleviating poverty, the EITC may also serve as a tool for reducing premature  
28  
29 mortality in the US.<sup>9 25</sup>  
30  
31  
32

33       The hypothesis that EITC might reduce premature mortality is generally supported  
34  
35 by previous research, however some studies have shown null findings while at least one  
36  
37 other has shown an increase in obesity associated with EITC <sup>27-35</sup>. Therefore, there is  
38  
39 reasonable uncertainty as to whether the program improves health, and there is a strong  
40  
41 need for more causal research. Because some states have supplemented federal EITC and  
42  
43 some have not, this invites a quasi-experimental analysis in which natural variation in state  
44  
45 policies can be used to estimate the impact of state-level supplemental EITC on health or  
46  
47 survival. However, to our knowledge, there is only one dataset that is capable of identifying  
48  
49 large numbers of individuals who are eligible for EITC by their state of residence that also  
50  
51  
52  
53  
54  
55  
56  
57  
58  
59  
60

1  
2  
3 provides longer-term follow up of their survival effects—the National Longitudinal  
4 Mortality Survey (NLMS).<sup>36</sup>  
5  
6

7  
8 The size of the EITC tax credit varies considerably by family size and marital status.  
9  
10 While an adult with no children can earn up to \$400 at tax time, single parent with 3  
11 children can earn over \$6,000. When EITC-eligible individuals are identified, it becomes  
12 possible to increase the accuracy of the analysis and to remove confounding of survival  
13 outcomes associated with emigration of healthier individuals to wealthier states <sup>37 38</sup>. Long-  
14 term follow up for survival is necessary because EITC-eligible individuals and families tend  
15 to be under age 65 and employed, and therefore tend to be healthier. The benefit of  
16 reduced exposure to poverty in early- and middle-aged adults is only likely to manifest  
17 after the age of 65 <sup>39</sup>.  
18  
19  
20  
21  
22  
23  
24  
25  
26  
27  
28

29 The NLMS is the largest mortality survey in the US, and allows us to conduct a  
30 targeted and comprehensive examination of the impact of state-level supplemental EITC on  
31 survival. Others have examined variation by family size <sup>28-31 40</sup> and by state level of  
32 supplementation <sup>34</sup>. However, these analyses are limited by assumptions necessary when  
33 using smaller and less detailed datasets.  
34  
35  
36  
37  
38  
39  
40

41 A particular problem faced by some previous quasi-experimental analyses is that it  
42 was necessary to look at aggregate state-level effects (e.g., among those with family  
43 incomes close to the poverty line) rather than effects among individuals with a high-  
44 probability of EITC receipt. By using the very large and detailed NLMS, administered by the  
45 Census Bureau, we are able to identify individuals likely to receive supplemental EITC and  
46 to explore dose-response effects within a quasi-experimental design. According to NLMS  
47  
48  
49  
50  
51  
52  
53  
54  
55  
56  
57  
58  
59  
60



1  
2  
3 and Census Bureau officials, ours is the first study to use longitudinal mortality data from  
4  
5 the NLMS to assess the impacts of state-level supplemental EITC on survival.  
6  
7  
8  
9

## 10 **Methods**

### 11 *Overview*

12  
13  
14  
15 We use survival models to estimate the impact of state-level supplemental EITC on  
16  
17 survival. The time frame for our analysis is 1986-2011, with mortality follow-up through  
18  
19 the end of 2011. During that time frame, federal and state EITC policies regarding eligible  
20  
21 incomes and size of the tax credit changed considerably (Table 1). The tax years we  
22  
23 analyzed were from 1985 to 2010, as the EITC rate applied to tax year  $t$  income would  
24  
25 benefit the family income in year  $t+1$ . Non-recipients were excluded from the analysis.  
26  
27  
28

29 Each respondent's record in our data set is recorded in person-years, extending  
30  
31 from their year of CPS/ASEC interview for the NLMS to their year of exit by death or by  
32  
33 reaching the end of mortality follow up at the end of 2011. We limited our analysis to  
34  
35 individuals under the age of 65 because many Americans will have retired by then and are  
36  
37 ineligible for EITC. However, mortality follow up extends beyond this window. A 64-year-  
38  
39 old at the time of survey would be followed to 69, 74, or until December 31, 2011  
40  
41 depending on the analysis used.  
42  
43  
44  
45  
46  
47

### 48 *Patient and Public Involvement*

49  
50 There was no patient involvement in this study.  
51

### 52 *Data*

1  
2  
3 While the NLMS contains multiple census data sources, the primary source of data is  
4 from the March Annual and Social Economic Supplements of the Current Population  
5 Survey. This supplement is an annual survey designed to collect detailed information about  
6 income, migration, health insurance, and a broader range of general economic data for  
7 persons aged 15 years and over. Roughly 60,000 households are interviewed annually in  
8 the March CPS. In that survey, one member of each household provides information for all  
9 family members.  
10  
11  
12  
13  
14  
15  
16  
17  
18

19 The March CPS and NLMS are weighted and standardized to be reflective of the US  
20 population. The NLMS currently consists of approximately 3.8 million records with over  
21 560,000 identified deaths up through December 31, 2011.<sup>41</sup> We use 793,000 records of  
22 adults aged 18-64 over 26 years (1986-2011, all years were included in our analysis).  
23 These data were weighted to be representative of the U.S. population under age 65 at the  
24 time of interview. The NLMS data from CPS/ASEC is linked to U.S. death certificates  
25 collected by the National Center for Health Statistics via the National Death Index (NDI).  
26  
27  
28  
29  
30  
31  
32  
33  
34  
35

36 Income cutoffs for supplemental EITC eligibility vary by state. Our information on  
37 state EITC cutoffs and eligibility for tax credits comes from source documents generously  
38 provided to us by TAXSIM<sup>42 43</sup>. We also added information from the Minnesota Working  
39 Family Credit from 1998 to 2010<sup>44</sup>, which differs somewhat from credits offered by other  
40 states.  
41  
42  
43  
44  
45  
46  
47  
48  
49

### 50 *Variables*

51  
52 Eligibility for EITC and the size of the tax credit received by eligible households,  
53 were estimated using reported family income, marital status, number of children, and the  
54  
55  
56  
57  
58  
59  
60

1  
2  
3 rules for supplemental EITC eligibility within each state. We use the March CPS to  
4  
5 determine the number of children in each household, the marital status of the  
6  
7 householders, and the inflation-adjusted household income. We then determine whether a  
8  
9 household is eligible for EITC at the federal level as well as the additional credit, if any, for  
10  
11 any given state.  
12  
13

14  
15 Some identification problems that remain: (1) we don't know if the head of  
16  
17 household is consistently employed (and thus eligible to claim EITC); (2) how many years  
18  
19 of state EITC exposure a given family had, because of (a) moving, (b) divorce, (c) changes  
20  
21 in number of kids, or (d) pay raises at work; (3) we were unable to estimate the effects of  
22  
23 total EITC exposure over time based on the year the state adopted EITC (due to  
24  
25 multicollinearity between year of supplemental EITC adoption and other control variables  
26  
27 in the model).  
28  
29

30  
31 The exposure variables of interest for the survival models are the estimated EITC  
32  
33 receipts – “Federal EITC” and “state EITC” – in respondent year ( $t$ ) from family income  
34  
35 earned in year  $t-1$ , as reported in the interview in year  $t$ . The EITC receipts are calculated  
36  
37 from the tax-year specific formulas from TAXSIM, and are applied to the subsequent  
38  
39 person-year observation. Both the “Federal EITC” and “state EITC” receipts are divided into  
40  
41 \$100 units to help with the presentation of parameter estimates from the regressions. The  
42  
43 EITC receipts are converted into constant \$2015 using the Consumer Price Index (CPI).  
44  
45 2015 was used as a year of reference as this was the year in which the variable was created.  
46  
47  
48  
49

50 To adjust for personal characteristics, we include control variables for (a) age at  
51  
52 person-year, (b) sex, (c) marital status, (d) race or ethnicity, (e) educational attainment, (f)  
53  
54 income, and (g) employment status in addition to the state and Federal EITC measures.  
55  
56  
57  
58  
59  
60

1  
2  
3 Other than age, income, and EITC receipts, these variables are measured as binary  
4 indicators. The descriptive statistics for the proportions of those indicators are shown in  
5  
6 Table 2 along with the means of the continuous variables. The central tendency is  
7  
8 expressed as standard deviations (SD) of the continuous variables (SD (x)), and as  
9  
10 standard errors (SE) for the proportion (SE (p)).  
11  
12  
13

14  
15 The categories for sex are male (reference group) and female. For marital status  
16 they are married (reference group) and not married, which includes widows, divorcees,  
17 separated persons, and the never married. The categories for race and ethnicity are  
18 Hispanic, White non-Hispanic (reference group), Black non-Hispanic, American  
19 Indian/Alaskan Native non-Hispanic, and Asian/Pacific Islander non-Hispanic. The  
20 categories for educational attainment are college degree, some college, high school diploma  
21 (reference group), and no diploma. The categories for employment are employed  
22 (reference group), unemployed, and “not in labor force.” These binary indicators are  
23 assigned to each person based on their response at their CPS/ASEC interview (at baseline)  
24 and are used through all person-years. These demographic characteristics are liable to  
25 change as a result of exposure to EITC.  
26  
27  
28  
29  
30  
31  
32  
33  
34  
35  
36  
37  
38  
39

40  
41 Family incomes are asked during their CPS/ASEC interview. The dollar amount at  
42 the time of interview is adjusted to the CPI-adjusted purchasing power of the person-year  
43 for calculation of nominal EITC receipts. Both the family income and EITC receipts are then  
44 adjusted to year 2015 dollars in the regression to keep purchasing power constant across  
45 the range of the time series. We calculated the state EITC benefits received using income,  
46 marriage, and number of children. The maximum income for inclusion in the regression  
47  
48  
49  
50  
51  
52  
53  
54  
55  
56  
57  
58  
59  
60

1  
2  
3 sample also controlled for these variables and the Federal EITC income thresholds for  
4  
5 various family situations.  
6

7  
8 To correct for the right-skewed distribution of income, we use the natural logarithm  
9  
10 for the variable and assign the value of zero when income is zero or negative. The  
11  
12 regression uses age at person-year instead of age at interview in order to properly adjust  
13  
14 for age-relative hazards of mortality.  
15  
16

### 17 18 19 *Model specification* 20

21  
22 We use Cox proportional hazards models (with state level fixed effects and errors  
23  
24 clustered at the primary sampling unit) to estimate the impact of state-level EITC  
25  
26 generosity on 5-year, 10-year, and maximum survival among adults (ages 18-64) between  
27  
28 1986 and 2011. State-level fixed effects, coupled with the use of constant (inflation-  
29  
30 adjusted) \$2015 dollars, are used to address differences between cohorts at each CPS year  
31  
32 of interview. Assumptions for proportionality are met.  
33  
34  
35

36 We used a difference-in-difference model with an intention-to-treat design,  
37  
38 assessing mortality according to people's eligibility for EITC on a state-by-state basis. While  
39  
40 eligibility will diverge from receipt of EITC funds, this design is the best way to assess the  
41  
42 efficacy of the EITC program as it actually exists; discordance between the program's  
43  
44 intended and actual recipients represents an important shortcoming in the program.  
45  
46

47  
48 Selecting a length of follow-up time over which to measure EITC's effects on survival  
49  
50 presents a conflict; shorter follow-up times are unlikely to capture EITC's effects on chronic  
51  
52 disease and other conditions that may impact long-term survival. However, longer follow-  
53  
54 up times introduce more uncertainty about possible changes in the socioeconomic status of  
55  
56  
57  
58  
59  
60

1  
2  
3 the participants in our sample. Because individuals' incomes, household sizes, marital  
4 status, and states of residence are known only at the time of interview in the Current  
5 Population Survey, we do not know how social and demographic variables change over  
6 time.  
7  
8  
9  
10  
11

12 We elected to use 10-year survival rates as our primary outcome measure because it  
13 represents a reasonable window for both capturing differences in survival between groups,  
14 and for minimizing error in our identification of EITC eligibility due to changes in family  
15 income, marital status, or family size (which are increasingly likely with a longer follow-up  
16 window). As a sensitivity analysis, we also estimated models with a shorter follow-up  
17 window (using 5-year survival as the model outcome) as well as models with a longer  
18 follow-up window (using survival rates over the entire follow-up period available for each  
19 respondent in the NLMS).  
20  
21  
22  
23  
24  
25  
26  
27  
28  
29  
30

31 Our set of person-year records consists of those records with "age at interview" of at  
32 least 18 years, and extending up through either (a) "age at person year" of 64 years, (b) the  
33 year of death (with "failure"=1), or (c) end of follow up at 2011. An additional inclusion  
34 rule includes only respondents with estimated family income that is less than twice the  
35 maximum Federal EITC income allowed for the respondent's family size. This income limit  
36 is to eliminate any possible regression distortions caused by observations on high-income  
37 individuals, who may have a different mortality risk pattern than the lower-income  
38 respondents we wish to analyze.  
39  
40  
41  
42  
43  
44  
45  
46  
47  
48  
49

50 All models use the NLMS person weights, which are divided and distributed among  
51 the person-years of the individual. The results of the models report the hazard ratios of  
52 mortality for deviations of each independent variable relative to the reference respondent  
53  
54  
55  
56  
57  
58  
59  
60

1  
2  
3 person-year, which would be (a) at the mean age at person-year, (b) male (c) married, (d)  
4 white non-Hispanic, (e) with a high school diploma, (f) with the average (logged) family  
5 income, and (g) employed, with zero dollars received from Federal or state EITC.  
6  
7  
8  
9  
10

## 11 12 **Results**

13  
14  
15 In interpreting these results, it is important to consider that our final models  
16 differed from their original specification. First, in the original specification, we did not  
17 control for state-level fixed effects. State-level fixed effects were added to control for  
18 differences in state-level policies that might correlate with state EITC benefits. Second, we  
19 had initially used a binary indicator to indicate state EITC receipt. Finally, it was  
20 recommended that we use \$100 increments as a tangible unit of measure because some  
21 recipients less than \$100 while others might receive thousands of dollars.  
22  
23  
24  
25  
26  
27  
28  
29  
30

31 There was significant variation in EITC generosity by state, and there was also a  
32 good deal of variation in the time of program implementation (Table 1). Our analytic  
33 sample included 793,000 adults aged 18-64 from all 50 states and Washington D.C.  
34  
35  
36  
37  
38  
39 Summary statistics for the analytic sample are presented in Table 2.

40  
41 Table 3 shows the results of three Cox proportional hazards regressions. The  
42 functional form of, and covariates within, all three regressions is the same but the follow up  
43 time differs (5-years, 10-years, and maximum). Our control variables show associations  
44 with mortality that are statistically significant at  $p < 0.001$  and consistent with previous  
45 research.<sup>36</sup> For example, mortality risk declines with income and employment but  
46 increases with age (Table 3). Females have a lower mortality risk than males, and Blacks  
47 have a much higher risk than Whites. Asians have the lowest mortality risk of any group.  
48  
49  
50  
51  
52  
53  
54  
55  
56  
57  
58  
59  
60

1  
2  
3 State EITC receipt is statistically-significant in all three models with a hazard ratio  
4  
5 (HR) = 0.973 (95% confidence interval [CI] = 0.951-0.996) for the 10-year follow up  
6  
7 model. Mortality hazards increased slightly as follow-up time increased (from 0.968 for the  
8  
9 5-year follow up model [95% CI = 0.941-0.995] to 0.979 for the maximum follow up [95%  
10  
11 CI = 0.959-0.999]. Federal EITC shows a small but statistically-significant increase in  
12  
13 mortality hazards in maximal follow up (1.003, 95% CI = 1.001-1005).  
14  
15  
16  
17  
18  
19

## 20 Discussion

21  
22 In this study, we examine the survival impact of state-level supplements to EITC  
23  
24 using a quasi-experimental design and individual-level data for 793,000 adults aged 18-64.  
25  
26 After adjusting for age, sex, race, education, family income, and employment status, we find  
27  
28 evidence for mortality benefits conferred by state-level supplemental EITC.  
29  
30

31 A hazard ratio of 0.97 over a 10-year period of follow-up corresponds to an  
32  
33 increase in life expectancy of roughly 2 weeks for every \$100 of state-level EITC  
34  
35 supplementation (in constant 2015 US dollars).<sup>45</sup> The results of a recent randomized-  
36  
37 controlled trial (RTC) suggests that the average eligible recipient might receive hundreds  
38  
39 of dollars in benefits per year, suggesting that the program has the potential to  
40  
41 meaningfully improve population health.<sup>8 35</sup>  
42  
43  
44

45 We also find very small negative impacts from the Federal EITC in one of the three  
46  
47 models (a 0.3% increase in hazards). We cannot rule out statistical artifact (collinearity  
48  
49 with state EITC receipts, partially systematic residuals over income that  $\ln(\text{income})$  does  
50  
51 not address, an imperfect control for state fixed effects). However, it is also possible that  
52  
53 once state-level benefits are controlled for we are picking up the hazards associated with  
54  
55  
56  
57  
58  
59  
60



1  
2  
3 employment (e.g., accidents while commuting or on the job) that are independent of the  
4  
5 credits themselves.  
6

### 7 8 *Strengths and limitations* 9

10 Our study explores temporal and spatial variation in outcome measures across  
11 states as well as dose-response effects across individuals. The NLMS affords a very large  
12 sample size, long-term mortality follow-up, and information on EITC eligibility at the  
13 individual level, providing a good deal of resolution relative to a previous study that  
14 examined aggregate state-level effects.<sup>46</sup> Moreover, because the sample size is very large  
15 and the NDI covers all states, it is possible to identify individual-level effects, and to do so  
16 irrespective of where the individual died. We were able to identify those participants who  
17 were eligible for EITC using TAXSIM, and to compare across states that did and did not  
18 have supplemental programs. Our study is consistent with previous studies, which showed  
19 that, while EITC receipt may be a risk factor for obesity, overall health and survival benefits  
20 have been noted <sup>27-33 35 40</sup>.  
21  
22  
23  
24  
25  
26  
27  
28  
29  
30  
31  
32  
33  
34  
35

36 However, our study is subject to a number of important limitations. First, it is  
37 difficult to precisely estimate the survival benefit associated with EITC because we were  
38 unable to quantify the number of years that any given participant was exposed to the  
39 credit. Moreover, while quasi-experimental in nature, there could be state-level factors that  
40 confound estimates (e.g., states with EITC supplementation may also offer other social  
41 welfare programs, offer fewer worker protection regulations, or be more likely to receive  
42 healthy migrants from other states). On the other hand, Federal regulations have  
43 disproportionately benefited poorer states that are less likely to implement supplemental  
44 EITC because these states have historically been high risk, low regulation. Despite the  
45  
46  
47  
48  
49  
50  
51  
52  
53  
54  
55  
56  
57  
58  
59  
60

1  
2  
3 potential for states to implement EITC in ways that may also correlate with mortality, our  
4 quasi-experimental design coupled with controls for income and employment produces  
5 estimates that should have a much higher degree of internal validity than associational  
6 studies.  
7  
8  
9  
10  
11

12 Additionally, our results include both states with refundable tax credits and non-  
13 refundable tax credits. While we know which states offer refundable or non-refundable  
14 credits, we simply don't know enough about individual household deductions or eligibility  
15 for other credits to know when non-refundability is a constraining limit or not, or how  
16 large a portion of the credit is retained by the state (on average) when there are non-  
17 refundability rules. What we do know is that non-refundable credits mean that our  
18 calculated benefits represent the top-level estimate of state EITC receipts, so that our test  
19 for a significant effect (possibly from a smaller number of state EITC benefit dollars) is  
20 conservative (that is, less likely to produce a low p-value). Finally, in a related limitation,  
21 we only observe EITC receipt in the year that the participant was interviewed, but record  
22 deaths no matter which state they occurred in. To the extent that a participant moved from  
23 a state with benefits to one without (or vice versa), the signal in our estimate is weakened,  
24 again rendering the estimate more conservative.  
25  
26  
27  
28  
29  
30  
31  
32  
33  
34  
35  
36  
37  
38  
39  
40  
41  
42  
43  
44

### 45 *Conclusions*

46  
47 While the EITC is an effective anti-poverty program, it tends to provide fairly  
48 modest income support<sup>8</sup>. These modest program effects may be offset by the fact that the  
49 vast majority of people who apply for EITC remain on EITC for many years<sup>47</sup>. The  
50 cumulative effects the income support provided by EITC over the years may therefore add  
51  
52  
53  
54  
55  
56  
57  
58  
59  
60

1  
2  
3 up to survival benefits over time. Nevertheless, a recent RCT showed that just three years  
4  
5 of exposure to supplemental income from EITC can produce measurable impacts on health-  
6  
7 related quality of life, at least among females.<sup>26</sup>  
8  
9

10 Our findings are important from a policy perspective. There is now reasonable  
11  
12 evidence that America's declining health and life expectancy are related to the declining  
13  
14 fortunes of lower- and middle-class families.<sup>48</sup> While some of the decline must be  
15  
16 addressed with structural changes to the health system<sup>3</sup> and other anti-poverty policies,<sup>25</sup>  
17  
18 <sup>49</sup> we find encouraging evidence that expanding the EITC could produce significant benefits  
19  
20 for health.  
21  
22  
23  
24  
25  
26  
27  
28  
29  
30  
31  
32  
33  
34  
35  
36  
37  
38  
39  
40  
41  
42  
43  
44  
45  
46  
47  
48  
49  
50  
51  
52  
53  
54  
55  
56  
57  
58  
59  
60

### Contributorship statement

The paper topic and analytical approach were conceived of by PM. PM led the final drafting of the paper and helped guide the analysis. JH conducted the statistical analyses, and made major contributions to the revisions of the manuscript. DV drafted much of the first version of the paper, particularly the methods and results, and helped guide the analysis in collaboration with JH. All authors made substantial efforts in responding to reviewer comments.

### Competing interests

The authors have no competing interests to disclose.

### Funding

Any opinions and conclusions expressed herein are those of the authors and do not necessarily reflect the views of the U.S. Census Bureau. All results have been reviewed to ensure that no confidential information is disclosed. The statistical summaries reported in this document have been cleared by the Census Bureau's Disclosure Review Board release authorization number CBDRB-FY19-366. This project was funded by the National Institute on Aging (5R01AG054466).

### Data sharing statement

1  
2  
3  
4  
5  
6  
7  
8  
9  
10  
11  
12  
13  
14  
15  
16  
17  
18  
19  
20  
21  
22  
23  
24  
25  
26  
27  
28  
29  
30  
31  
32  
33  
34  
35  
36  
37  
38  
39  
40  
41  
42  
43  
44  
45  
46  
47  
48  
49  
50  
51  
52  
53  
54  
55  
56  
57  
58  
59  
60

The National Longitudinal Mortality Survey (NLMS) is maintained by the United States Bureau of the Census and contains identified data. These data can be accessed only by certified personnel.

For peer review only

## References

1. Woolf SH, Schoomaker H. Life Expectancy and Mortality Rates in the United States, 1959-2017. *JAMA* 2019;322(20):1996-2016.
2. Muennig PA, Glied SA. What changes in survival rates tell us about us health care. *Health Aff (Millwood)* 2010;29(11):2105-13. doi: 10.1377/hlthaff.2010.0073
3. Polsky D, Grande D. The burden of health care costs for working families--implications for reform. *N Engl J Med* 2009;361(5):437-9. doi: 361/5/437 [pii] 10.1056/NEJMp0905297 [published Online First: 2009/07/31]
4. Adler NE, Stewart, J. Health disparities across the lifespan: Meaning, methods, and mechanisms. *Ann N Y Acad Sci* 2010;1186:5-23.
5. Hamad R, Rehkopf DH. Poverty and Child Development: A Longitudinal Study of the Impact of the Earned Income Tax Credit. *Am J Epidemiol* 2016;183(9):775-84. doi: 10.1093/aje/kwv317 [published Online First: 2016/04/09]
6. Haskins R, Margolis G. Show me the evidence: Obama's fight for rigor and results in social policy: Brookings Institution Press 2014.
7. Muennig P, Fiscella K, Tancredi D, et al. The relative health burden of selected social and behavioral risk factors in the United States: implications for policy. *Am J Public Health* 2010;100(9):1758-64. doi: 10.2105/AJPH.2009.165019
8. Paycheck Plus: Expanded Earned Income Tax Credit for Single Adults. Available online at: [https://www.mdrc.org/sites/default/files/PaycheckPlus\\_FinalReport.pdf](https://www.mdrc.org/sites/default/files/PaycheckPlus_FinalReport.pdf) Accessed: 8/22/19. [
9. Plescia M, Emmanuel C. Reducing Health Disparities by Addressing Social Determinants of Health The Mecklenburg County Experience. *N C Med J* 2014;75(6):417-21.
10. Kawachi I, Subramanian SV, Kim D. Social Capital and Health. New York: Springer 2010.
11. Sorlie PD, Rogot E. Mortality by employment status in the National Longitudinal Mortality Study. *Am J Epidemiol* 1990;132(5):983-92.
12. Rogot E, Sorlie PD, Johnson NJ. Life expectancy by employment status, income, and education in the National Longitudinal Mortality Study. *Public Health Rep* 1992;107(4):457-61.
13. McEwen BS, Mirsky AE. How socioeconomic status may "get under the skin" and affect the heart. *Eur Heart J* 2002;23(22):1727-8.
14. McEwen BS, Nasca C, Gray JD. Stress effects on neuronal structure: hippocampus, amygdala, and prefrontal cortex. *Neuropsychopharmacology* 2016;41(1):3.
15. Sapolsky RM, Krey LC, McEwen BS. Prolonged glucocorticoid exposure reduces hippocampal neuron number: implications for aging. *J Neurosci* 1985;5(5):1222-7.
16. Seeman T, Epel E, Gruenewald T, et al. Socio - economic differentials in peripheral biology: Cumulative allostatic load. *Ann N Y Acad Sci* 2010;1186(1):223-39.
17. Fredrickson BL, Grewen KM, Coffey KA, et al. A functional genomic perspective on human well-being. *Proceedings of the National Academy of Sciences* 2013;110(33):13684-89.
18. McEwen BS. Protective and damaging effects of stress mediators. *N Engl J Med* 1998;338(3):171-9.

19. Roy M, Sapolsky RM. The exacerbation of hippocampal excitotoxicity by glucocorticoids is not mediated by apoptosis. *Neuroendocrinology* 2003;77(1):24-31.
20. Sapolsky RM, Krey LC, McEwen BS. The neuroendocrinology of stress and aging: the glucocorticoid cascade hypothesis. *Endocr Rev* 1986;7(3):284-301.
21. Despard M, Perantie D, Oliphant J, et al. Do EITC recipients use tax refunds to get ahead? New evidence from refund to savings. *CSD research brief* 2015(15-38)
22. Sykes J, Križ K, Edin K, et al. Dignity and dreams: What the Earned Income Tax Credit (EITC) means to low-income families. *Am Sociol Rev* 2015;80(2):243-67.
23. Seeman TE, McEwen BS, Rowe JW, et al. Allostatic load as a marker of cumulative biological risk: MacArthur studies of successful aging. *Proc Natl Acad Sci U S A* 2001;98(8):4770-5.
24. Santiago CD, Wadsworth ME, Stump J. Socioeconomic status, neighborhood disadvantage, and poverty-related stress: Prospective effects on psychological syndromes among diverse low-income families. *J Econ Psychol* 2011;32(2):218-30.
25. Courtin E, Kim S, Song S, et al. Can Social Policies Improve Health? A Systematic Review and Meta-Analysis of 38 Randomized Trials. *Milbank Q* 2020 doi: 10.1111/1468-0009.12451 [published Online First: 2020/03/20]
26. Courtin E, Aloisi K, Miller C, et al. The Health Effects Of Expanding The Earned Income Tax Credit: Results From New York City. *Health Aff (Millwood)* 2020;39(7)
27. Rehkopf DH, Strully KW, Dow WH. The short-term impacts of Earned Income Tax Credit disbursement on health. *Int J Epidemiol* 2014;43(6):1884-94. doi: 10.1093/ije/dyu172 [published Online First: 2014/08/31]
28. Averett S, Wang Y. The effects of Earned Income Tax Credit payment expansion on maternal smoking. *Health Econ* 2013;22(11):1344-59. doi: 10.1002/hec.2886 [published Online First: 2012/12/15]
29. Cowan B, Tefft N. Education, Maternal Smoking, and the Earned Income Tax Credit. *The BE Journal of Economic Analysis & Policy* 2012;12(1):39.
30. Larrimore J. Does a higher income have positive health effects? Using the earned income tax credit to explore the income-health gradient. *Milbank Q* 2011;89(4):694-727. doi: 10.1111/j.1468-0009.2011.00647.x [published Online First: 2011/12/23]
31. Strully KW, Rehkopf DH, Xuan Z. Effects of Prenatal Poverty on Infant Health: State Earned Income Tax Credits and Birth Weight. *Am Sociol Rev* 2010;75(4):534-62. doi: 10.1177/0003122410374086 [published Online First: 2011/06/07]
32. Schmeiser MD. Expanding wallets and waistlines: the impact of family income on the BMI of women and men eligible for the Earned Income Tax Credit. *Health Econ* 2009;18(11):1277-94. doi: 10.1002/hec.1430 [published Online First: 2009/01/15]
33. Wicks-Lim J, Arno PS. Improving population health by reducing poverty: New York's Earned Income Tax Credit. *SSM Popul Health* 2017;3:373-81. doi: 10.1016/j.ssmph.2017.03.006 [published Online First: 2018/01/20]
34. Muennig PA, Mohit B, Wu J, et al. Cost Effectiveness of the Earned Income Tax Credit as a Health Policy Investment. *American journal of preventive medicine* 2016;51(6):874-81. doi: 10.1016/j.amepre.2016.07.001 [published Online First: 2016/09/12]
35. Muennig P, Allen H, Courtin E. Mental health impacts of increasing the Earned Income Tax Credit: evidence from a randomized trial. 2020



- 1  
2  
3  
4  
5  
6  
7  
8  
9  
10  
11  
12  
13  
14  
15  
16  
17  
18  
19  
20  
21  
22  
23  
24  
25  
26  
27  
28  
29  
30  
31  
32  
33  
34  
35  
36  
37  
38  
39  
40  
41  
42  
43  
44  
45  
46  
47  
48  
49  
50  
51  
52  
53  
54  
55  
56  
57  
58  
59  
60
36. Sorlie PD, Backlund E, Keller JB. US mortality by economic, demographic, and social characteristics: the National Longitudinal Mortality Study. *Am J Public Health* 1995;85(7):949-56.
  37. Preston SH, Elo IT. Anatomy of a Municipal Triumph: New York City's Upsurge in Life Expectancy. *Population and Development Review* 2013;40(1):1-29.
  38. Muennig P, Masters R, Vail D, et al. The effects of New York City's coordinated public health programmes on mortality through 2011. *Int J Epidemiol* 2017;46(4):1239-48. doi: 10.1093/ije/dyw290
  39. Muennig P. Health selection vs. causation in the income gradient: what can we learn from graphical trends? *J Health Care Poor Underserved* 2008;19(2):574-9. doi: 10.1353/hpu.0.0018
  40. Hamad R, Rehkopf DH. Poverty, Pregnancy, and Birth Outcomes: A Study of the Earned Income Tax Credit. *Paediatr Perinat Epidemiol* 2015;29(5):444-52. doi: 10.1111/ppe.12211 [published Online First: 2015/07/28]
  41. United States Census Bureau. NLMS Public-Use Reference Manual. Available online at: <https://www.google.com/search?client=safari&rls=en&q=NLMS+Public+Use+Reference+Manual.&ie=UTF-8&oe=UTF-8>. Accessed 1/7/2020. [Available from: [https://www.census.gov/did/www/nlms/publications/docs/referenceManual\\_v4.pdf](https://www.census.gov/did/www/nlms/publications/docs/referenceManual_v4.pdf) accessed 12/15/2018.
  42. Feenberg D, Coutts E. An Introduction to the TAXSIM Model. *J Policy Anal Manage* 1993;12(1):189-94. doi: 10.2307/3325474
  43. Feenberg D. TAXSIM: State EITC provisions 1977-2016 [Available from: <http://users.nber.org/~taxsim/state-eitc.html>. accessed 12/15/2018.
  44. Feenberg D. Minnesota Working Family Credit Table 2018 [Available from: [http://users.nber.org/~taxsim/eitc\\_MN.pdf](http://users.nber.org/~taxsim/eitc_MN.pdf).
  45. Muennig PA, Gold MR. Using the years-of-healthy-life measure to calculate QALYs. *Am J Prev Med* 2001;20(1):35-9.
  46. Muennig PA, Mohit B, Wu J, et al. Cost Effectiveness of the Earned Income Tax Credit as a Health Policy Investment. *Am J Prev Med* 2016 doi: 10.1016/j.amepre.2016.07.001
  47. Grogger J. Welfare transitions in the 1990s: The economy, welfare policy, and the EITC. *J Policy Anal Manage* 2004;23(4):671-95.
  48. Muennig PA, Reynolds M, Fink DS, et al. America's Declining Well-Being, Health, and Life Expectancy: Not Just a White Problem. *Am J Public Health* 2018;108(12):1626-31. doi: 10.2105/AJPH.2018.304585 [published Online First: 2018/09/27]
  49. Courtin E, Kim S, Song S, et al. Can Social Policies Improve Health? A Systematic Review and Meta-Analysis of 38 Randomized Trials. Accepted at *Milbank Quarterly*. In Press. 2020



Table 1. The Supplemental Earned Income Tax Credit (EITC) benefit by state and the year enacted.\*

| State                | Year Enacted | Percent Addition to Federal EITC |
|----------------------|--------------|----------------------------------|
| California           | 2015†        | 85                               |
| Colorado             | 1999, 2013†  | 10                               |
| Connecticut          | 2011         | 30                               |
| Delaware             | 2005         | 20                               |
| District of Columbia | 2000         | 40                               |
| Illinois             | 2000         | 10                               |
| Indiana              | 1999         | 9                                |
| Iowa                 | 1989         | 15                               |
| Kansas               | 1998         | 17                               |
| Louisiana            | 2007         | 3.5                              |
| Maine                | 2000         | 5                                |
| Maryland             | 1987         | 25.5                             |
| Massachusetts        | 1997         | 23                               |
| Michigan             | 2006         | 6                                |
| Minnesota            | 1991         | 35                               |
| Nebraska             | 2006         | 10                               |
| New Jersey           | 2000         | 30                               |
| New Mexico           | 2007         | 10                               |
| New York             | 1994         | 30                               |
| Ohio                 | 2013†        | 10                               |
| Oklahoma             | 2002         | 5                                |
| Oregon               | 1997         | 8                                |
| Rhode Island         | 1986         | 12.5                             |
| Vermont              | 1988         | 32                               |
| Virginia             | 2004         | 20                               |
| Washington           | 2000         | 10                               |
| Wisconsin            | 1989         | 11                               |

\*Details of implementation and variability by family size and year available from TAXSIM<sup>24-25</sup>

†Not included in analysis as having supplemental EITC because program implementation was after the period of our mortality follow-up.

Table 2: Descriptive statistics for lower-income adult person-years (ages 18-64 at initial interview) in the National Longitudinal Mortality Survey (NLMS), 1986-2011. (United States Bureau of the Census approval DRB approval number CBDRB-FY19-366.)

| Variable                                                                           | Maximum follow up <sup>1</sup> |                  | 10-year follow up <sup>1</sup> |                  | 5-year follow-up <sup>1</sup> |                  |
|------------------------------------------------------------------------------------|--------------------------------|------------------|--------------------------------|------------------|-------------------------------|------------------|
|                                                                                    | Mean                           | (SD(x))<br>SE(p) | Mean                           | (SD(x))<br>SE(p) | Mean                          | (SD(x))<br>SE(p) |
| Age at person-year                                                                 | 43.2                           | (13.5)           | 41.6                           | (13.2)           | 40.5                          | (13.2)           |
| Female (%)                                                                         | 52.5                           | 0.03             | 52.2                           | 0.03             | 52.0                          | 0.05             |
| Married at interview (%)                                                           | 47.5                           | 0.03             | 46.5                           | 0.03             | 45.8                          | 0.04             |
| Race/ethnicity:                                                                    |                                |                  |                                |                  |                               |                  |
| Hispanic (%)                                                                       | 15.1                           | 0.02             | 15.9                           | 0.02             | 16.5                          | 0.03             |
| White (%)                                                                          | 65.5                           | 0.03             | 64.3                           | 0.03             | 63.5                          | 0.04             |
| Black (%)                                                                          | 15.1                           | 0.02             | 15.2                           | 0.02             | 15.3                          | 0.03             |
| Native American (%)                                                                | 0.87                           | 0.004            | 0.88                           | 0.005            | 0.86                          | 0.007            |
| Asian/ Pacific Islander (%)                                                        | 3.5                            | 0.010            | 3.7                            | 0.013            | 3.8                           | 0.016            |
| Highest educational attainment at time of interview:                               |                                |                  |                                |                  |                               |                  |
| No high school diploma (%)                                                         | 20.1                           | 0.02             | 19.8                           | 0.03             | 19.3                          | 0.03             |
| High school diploma (%)                                                            | 37.7                           | 0.03             | 37.0                           | 0.03             | 36.5                          | 0.04             |
| Some college education (%)                                                         | 26.6                           | 0.03             | 27.3                           | 0.03             | 27.7                          | 0.04             |
| College degree or higher (%)                                                       | 15.6                           | 0.02             | 16.0                           | 0.03             | 16.4                          | 0.03             |
| Family income at time of interview \$2015; (mean, SD)                              | 40,500                         | (22,500)         | 40,000                         | (22,500)         | 39,500                        | (22,500)         |
| Family income, \$2015 (as natural log. of income at time of interview; mean, (SD)) | 10.2                           | (1.8)            | 10.1                           | (1.8)            | 10.1                          | (1.9)            |
| Employment status at time of interview:                                            |                                |                  |                                |                  |                               |                  |
| Employed                                                                           | 68.0                           | 0.03             | 67.6                           | 0.03             | 66.9                          | 0.04             |
| Unemployed                                                                         | 11.2                           | 0.02             | 11.9                           | 0.03             | 12.7                          | 0.03             |
| Not in labor force                                                                 | 20.8                           | 0.02             | 20.5                           | 0.03             | 20.4                          | 0.04             |
| Receiving State EITC (%) <sup>1</sup>                                              | 27.8                           | 0.03             | 27.2                           | 0.03             | 27.3                          | 0.04             |
| Federal EITC receipts (in \$100 units; mean, (SD)) <sup>1</sup>                    | 14.8                           | (13.0)           | 15.9                           | (14.1)           | 16.3                          | (14.5)           |
| State EITC receipts (in \$100 units; mean (SD)) <sup>1</sup>                       | 3.26                           | (4.06)           | 3.29                           | (4.13)           | 3.32                          | (4.18)           |
| Sample size (person-years) <sup>2</sup>                                            | 8,820,000                      |                  | 5,960,000                      |                  | 3,530,000                     |                  |
| Sample size (respondents) <sup>2</sup>                                             | 793,000                        |                  | 793,000                        |                  | 793,000                       |                  |

|                               |        |        |        |
|-------------------------------|--------|--------|--------|
| Number of deaths <sup>2</sup> | 48,000 | 24,000 | 12,000 |
|-------------------------------|--------|--------|--------|

Note: results weighted to be representative of the 0-64 U.S. population in 2015.

<sup>1</sup>SD = standard deviation; SE = standard error; EITC = Earned Income Tax Credit.

For Tmax: Conditional means for <fed\_eitc> on 2.250,000 PY (206,000 persons), conditional means for <st\_eitc> on 281,000 PY (42,500 persons). [Correlation is 0.285 among Fed. EITC recipients.]

For T10: Conditional means for <fed\_eitc> on 1,540,000 PY (206,000 persons), conditional means for <st\_eitc> on 246,000 PY (42,500 persons). [Correlation is 0.291 among <fed\_eitc> recipients.]

For T05: Conditional means for <fed\_eitc> on 912,000 PY (206,000 persons), conditional means for <st\_eitc> on 168,000 PY (42,500 persons). [Correlation is 0.301 among <fed\_eitc> recipients.]

<sup>2</sup>Sample counts are rounded according to the U.S. Census Bureau Disclosure Review Board Disclosure Avoidance Guidelines.

Note: The statistics in this table have been cleared by the Census Bureau's Disclosure Review Board with release authorization number CBDRB-FY19-366.

Table 3: Cox proportional hazard models of supplemental EITC's impact on mortality risk for lower-income adults for adult person-years (ages 18-64) in the NLMS, 1986-2011. (United States Bureau of the Census approval DRB approval number CBDRB-FY19-366.)

| Variable                                                                               | Maximum follow-up |             | 10-year follow-up |             | 5-year follow-up    |             |
|----------------------------------------------------------------------------------------|-------------------|-------------|-------------------|-------------|---------------------|-------------|
|                                                                                        | Hazard ratio      | 95% CI      | Hazard ratio      | 95% CI      | Hazard ratio        | 95% CI      |
| Age at person-year (years)                                                             | 1.071***          | 1.070-1.073 | 1.067***          | 1.066-1.069 | 1.064***            | 1.062-1.066 |
| Female                                                                                 | 0.595***          | 0.576-0.614 | 0.593***          | 0.571-0.616 | 0.586***            | 0.559-0.614 |
| Married at time of interview                                                           | 0.692***          | 0.669-0.715 | 0.685***          | 0.658-0.712 | 0.686***            | 0.653-0.720 |
| Race/ethnicity (White, non-Hispanic is referent):                                      |                   |             |                   |             |                     |             |
| Hispanic                                                                               | 0.588***          | 0.550-0.629 | 0.590***          | 0.546-0.638 | 0.600***            | 0.547-0.659 |
| Black                                                                                  | 1.086**           | 1.039-1.135 | 1.091***          | 1.037-1.149 | 1.085*              | 1.019-1.156 |
| Native American                                                                        | 1.26***           | 1.10-1.45   | 1.28**            | 1.10-1.49   | 1.30**              | 1.08-1.56   |
| Asian/ Pacific Islander                                                                | 0.578***          | 0.509-0.657 | 0.579***          | 0.500-0.670 | 0.580***            | 0.486-0.691 |
| Highest educational attainment at time of interview (High school diploma is referent): |                   |             |                   |             |                     |             |
| No high school diploma                                                                 | 1.111***          | 1.070-1.154 | 1.087***          | 1.039-1.137 | 1.072*              | 1.013-1.134 |
| Some college education                                                                 | 0.889***          | 0.850-0.929 | 0.887***          | 0.842-0.934 | 0.884***            | 0.829-0.941 |
| College degree or higher                                                               | 0.701***          | 0.659-0.746 | 0.713***          | 0.663-0.767 | 0.729***            | 0.667-0.796 |
| Family income, 2015 dollars (as natural log. of income at time of interview)           | 0.986***          | 0.977-0.995 | 0.988*            | 0.978-0.998 | 0.989 <sup>NS</sup> | 0.977-1.001 |
| Employment status at time of interview (Employed is referent):                         |                   |             |                   |             |                     |             |
| Unemployed                                                                             | 3.20***           | 3.06-3.34   | 3.47***           | 3.30-3.6    | 3.78***             | 3.56-4.01   |
| Not in labor force                                                                     | 1.79***           | 1.72-1.86   | 1.91***           | 1.82-2.00   | 2.03***             | 1.91-2.15   |
| Earned Income Tax Credit (EITC) in \$100 units of 2015\$                               |                   |             |                   |             |                     |             |

|                                           |           |             |                     |             |                     |             |
|-------------------------------------------|-----------|-------------|---------------------|-------------|---------------------|-------------|
| Federal EITC                              | 1.003*    | 1.001-1.005 | 1.002 <sup>NS</sup> | 1.000-1.005 | 1.002 <sup>NS</sup> | 0.999-1.005 |
| State EITC                                | 0.979*    | 0.959-0.999 | 0.973*              | 0.951-0.996 | 0.968*              | 0.941-0.995 |
| Sample size (N=person-years) <sup>1</sup> | 8,820,000 |             | 5,960,000           |             | 3,530,000           |             |

2  
3  
4  
5 All three Cox proportional hazard models include state fixed-effects corrections (state HRs not shown), and time-trends based  
6 on the year of the respondent's ACS interview.  
7 \* p<0.05, \*\* p<0.01, \*\*\* p<0.001  
8 <sup>1</sup> Sample counts are rounded according to the U.S. Census Bureau Disclosure Review Board Disclosure Avoidance Guidelines.  
9 All models included N=793,000 respondents.  
10 <sup>NS</sup> Not statistically significant at p <= 0.05.  
11 Note: The statistics in this table have been cleared by the Census Bureau's Disclosure Review Board with release authorization  
number CBDRB-FY19-366.

## STROBE Statement—checklist of items that should be included in reports of observational studies

|                              | Item No                                                                                                                                                                                                                                                                                                   | Recommendation                                                                                                                                                                                                                                                                                                                                                                                                                                                         | Page No |
|------------------------------|-----------------------------------------------------------------------------------------------------------------------------------------------------------------------------------------------------------------------------------------------------------------------------------------------------------|------------------------------------------------------------------------------------------------------------------------------------------------------------------------------------------------------------------------------------------------------------------------------------------------------------------------------------------------------------------------------------------------------------------------------------------------------------------------|---------|
| <b>Title and abstract</b>    | 1                                                                                                                                                                                                                                                                                                         | (a) Indicate the study's design with a commonly used term in the title or the abstract                                                                                                                                                                                                                                                                                                                                                                                 | 1       |
|                              |                                                                                                                                                                                                                                                                                                           | (b) Provide in the abstract an informative and balanced summary of what was done and what was found                                                                                                                                                                                                                                                                                                                                                                    | 2       |
| <b>Introduction</b>          |                                                                                                                                                                                                                                                                                                           |                                                                                                                                                                                                                                                                                                                                                                                                                                                                        |         |
| Background/rationale         | 2                                                                                                                                                                                                                                                                                                         | Explain the scientific background and rationale for the investigation being reported                                                                                                                                                                                                                                                                                                                                                                                   | 3       |
| Objectives                   | 3                                                                                                                                                                                                                                                                                                         | State specific objectives, including any prespecified hypotheses                                                                                                                                                                                                                                                                                                                                                                                                       | 3       |
| <b>Methods</b>               |                                                                                                                                                                                                                                                                                                           |                                                                                                                                                                                                                                                                                                                                                                                                                                                                        |         |
| Study design                 | 4                                                                                                                                                                                                                                                                                                         | Present key elements of study design early in the paper                                                                                                                                                                                                                                                                                                                                                                                                                | 5       |
| Setting                      | 5                                                                                                                                                                                                                                                                                                         | Describe the setting, locations, and relevant dates, including periods of recruitment, exposure, follow-up, and data collection                                                                                                                                                                                                                                                                                                                                        | 5       |
| Participants                 | 6                                                                                                                                                                                                                                                                                                         | (a) <i>Cohort study</i> —Give the eligibility criteria, and the sources and methods of selection of participants. Describe methods of follow-up<br><i>Case-control study</i> —Give the eligibility criteria, and the sources and methods of case ascertainment and control selection. Give the rationale for the choice of cases and controls<br><i>Cross-sectional study</i> —Give the eligibility criteria, and the sources and methods of selection of participants | 5       |
|                              |                                                                                                                                                                                                                                                                                                           | (b) <i>Cohort study</i> —For matched studies, give matching criteria and number of exposed and unexposed<br><i>Case-control study</i> —For matched studies, give matching criteria and the number of controls per case                                                                                                                                                                                                                                                 | NA      |
| Variables                    | 7                                                                                                                                                                                                                                                                                                         | Clearly define all outcomes, exposures, predictors, potential confounders, and effect modifiers. Give diagnostic criteria, if applicable                                                                                                                                                                                                                                                                                                                               | 6       |
| Data sources/<br>measurement | 8*                                                                                                                                                                                                                                                                                                        | For each variable of interest, give sources of data and details of methods of assessment (measurement). Describe comparability of assessment methods if there is more than one group                                                                                                                                                                                                                                                                                   | 7       |
| Bias                         | 9                                                                                                                                                                                                                                                                                                         | Describe any efforts to address potential sources of bias                                                                                                                                                                                                                                                                                                                                                                                                              | 11      |
| Study size                   | 10                                                                                                                                                                                                                                                                                                        | Explain how the study size was arrived at                                                                                                                                                                                                                                                                                                                                                                                                                              |         |
| Quantitative variables       | 11                                                                                                                                                                                                                                                                                                        | Explain how quantitative variables were handled in the analyses. If applicable, describe which groupings were chosen and why                                                                                                                                                                                                                                                                                                                                           | 6       |
| Statistical methods          | 12                                                                                                                                                                                                                                                                                                        | (a) Describe all statistical methods, including those used to control for confounding                                                                                                                                                                                                                                                                                                                                                                                  | 7       |
|                              |                                                                                                                                                                                                                                                                                                           | (b) Describe any methods used to examine subgroups and interactions                                                                                                                                                                                                                                                                                                                                                                                                    | NA      |
|                              | (c) Explain how missing data were addressed                                                                                                                                                                                                                                                               | 4                                                                                                                                                                                                                                                                                                                                                                                                                                                                      |         |
|                              | (d) <i>Cohort study</i> —If applicable, explain how loss to follow-up was addressed<br><i>Case-control study</i> —If applicable, explain how matching of cases and controls was addressed<br><i>Cross-sectional study</i> —If applicable, describe analytical methods taking account of sampling strategy | 6                                                                                                                                                                                                                                                                                                                                                                                                                                                                      |         |
|                              | (e) Describe any sensitivity analyses                                                                                                                                                                                                                                                                     |                                                                                                                                                                                                                                                                                                                                                                                                                                                                        |         |

Continued on next page

1  
2  
3  
4  
5  
6  
7  
8  
9  
10  
11  
12  
13  
14  
15  
16  
17  
18  
19  
20  
21  
22  
23  
24  
25  
26  
27  
28  
29  
30  
31  
32  
33  
34  
35  
36  
37  
38  
39  
40  
41  
42  
43  
44  
45  
46  
47  
48  
49  
50  
51  
52  
53  
54  
55  
56  
57  
58  
59  
60**Results**

|                  |     |                                                                                                                                                                                                              |    |
|------------------|-----|--------------------------------------------------------------------------------------------------------------------------------------------------------------------------------------------------------------|----|
| Participants     | 13* | (a) Report numbers of individuals at each stage of study—eg numbers potentially eligible, examined for eligibility, confirmed eligible, included in the study, completing follow-up, and analysed            | 4  |
|                  |     | (b) Give reasons for non-participation at each stage                                                                                                                                                         | NA |
|                  |     | (c) Consider use of a flow diagram                                                                                                                                                                           | NA |
| Descriptive data | 14* | (a) Give characteristics of study participants (eg demographic, clinical, social) and information on exposures and potential confounders                                                                     | 6  |
|                  |     | (b) Indicate number of participants with missing data for each variable of interest                                                                                                                          | NA |
|                  |     | (c) <i>Cohort study</i> —Summarise follow-up time (eg, average and total amount)                                                                                                                             | 7  |
| Outcome data     | 15* | <i>Cohort study</i> —Report numbers of outcome events or summary measures over time                                                                                                                          | 10 |
|                  |     | <i>Case-control study</i> —Report numbers in each exposure category, or summary measures of exposure                                                                                                         | NA |
|                  |     | <i>Cross-sectional study</i> —Report numbers of outcome events or summary measures                                                                                                                           | NA |
| Main results     | 16  | (a) Give unadjusted estimates and, if applicable, confounder-adjusted estimates and their precision (eg, 95% confidence interval). Make clear which confounders were adjusted for and why they were included | 10 |
|                  |     | (b) Report category boundaries when continuous variables were categorized                                                                                                                                    | NA |
|                  |     | (c) If relevant, consider translating estimates of relative risk into absolute risk for a meaningful time period                                                                                             | NA |
| Other analyses   | 17  | Report other analyses done—eg analyses of subgroups and interactions, and sensitivity analyses                                                                                                               | NA |

**Discussion**

|                  |    |                                                                                                                                                                            |    |
|------------------|----|----------------------------------------------------------------------------------------------------------------------------------------------------------------------------|----|
| Key results      | 18 | Summarise key results with reference to study objectives                                                                                                                   | 14 |
| Limitations      | 19 | Discuss limitations of the study, taking into account sources of potential bias or imprecision. Discuss both direction and magnitude of any potential bias                 | 15 |
| Interpretation   | 20 | Give a cautious overall interpretation of results considering objectives, limitations, multiplicity of analyses, results from similar studies, and other relevant evidence | 13 |
| Generalisability | 21 | Discuss the generalisability (external validity) of the study results                                                                                                      | 11 |

**Other information**

|         |    |                                                                                                                                                               |    |
|---------|----|---------------------------------------------------------------------------------------------------------------------------------------------------------------|----|
| Funding | 22 | Give the source of funding and the role of the funders for the present study and, if applicable, for the original study on which the present article is based | 15 |
|---------|----|---------------------------------------------------------------------------------------------------------------------------------------------------------------|----|

\*Give information separately for cases and controls in case-control studies and, if applicable, for exposed and unexposed groups in cohort and cross-sectional studies.

**Note:** An Explanation and Elaboration article discusses each checklist item and gives methodological background and published examples of transparent reporting. The STROBE checklist is best used in conjunction with this article (freely available on the Web sites of PLoS Medicine at <http://www.plosmedicine.org/>, Annals of Internal Medicine at <http://www.annals.org/>, and Epidemiology at <http://www.epidem.com/>). Information on the STROBE Initiative is available at [www.strobe-statement.org](http://www.strobe-statement.org).

# BMJ Open

## Can Antipoverty Programs Save Lives? Quasi-experimental evidence from the Earned Income Tax Credit in the United States

|                                 |                                                                                                            |
|---------------------------------|------------------------------------------------------------------------------------------------------------|
| Journal:                        | <i>BMJ Open</i>                                                                                            |
| Manuscript ID                   | bmjopen-2020-037051.R2                                                                                     |
| Article Type:                   | Original research                                                                                          |
| Date Submitted by the Author:   | 10-Jul-2020                                                                                                |
| Complete List of Authors:       | Muennig, Peter; Columbia University, Vail, Daniel; Stanford University Hakes, Jahn; U.S. Bureau of Census, |
| <b>Primary Subject Heading</b>: | Health policy                                                                                              |
| Secondary Subject Heading:      | Public health, Health economics                                                                            |
| Keywords:                       | PUBLIC HEALTH, Health policy < HEALTH SERVICES ADMINISTRATION & MANAGEMENT, SOCIAL MEDICINE                |
|                                 |                                                                                                            |

SCHOLARONE™  
Manuscripts





I, the Submitting Author has the right to grant and does grant on behalf of all authors of the Work (as defined in the below author licence), an exclusive licence and/or a non-exclusive licence for contributions from authors who are: i) UK Crown employees; ii) where BMJ has agreed a CC-BY licence shall apply, and/or iii) in accordance with the terms applicable for US Federal Government officers or employees acting as part of their official duties; on a worldwide, perpetual, irrevocable, royalty-free basis to BMJ Publishing Group Ltd ("BMJ") its licensees and where the relevant Journal is co-owned by BMJ to the co-owners of the Journal, to publish the Work in this journal and any other BMJ products and to exploit all rights, as set out in our [licence](#).

The Submitting Author accepts and understands that any supply made under these terms is made by BMJ to the Submitting Author unless you are acting as an employee on behalf of your employer or a postgraduate student of an affiliated institution which is paying any applicable article publishing charge ("APC") for Open Access articles. Where the Submitting Author wishes to make the Work available on an Open Access basis (and intends to pay the relevant APC), the terms of reuse of such Open Access shall be governed by a Creative Commons licence – details of these licences and which [Creative Commons](#) licence will apply to this Work are set out in our licence referred to above.

Other than as permitted in any relevant BMJ Author's Self Archiving Policies, I confirm this Work has not been accepted for publication elsewhere, is not being considered for publication elsewhere and does not duplicate material already published. I confirm all authors consent to publication of this Work and authorise the granting of this licence.

1  
2  
3 Can Antipoverty Programs Save Lives? Quasi-experimental evidence from the Earned  
4 Income Tax Credit in the United States  
5  
6  
7  
8  
9

10 Peter Muennig, M.D., M.P.H.<sup>1</sup>; Daniel Vail, MD.<sup>2</sup>; Jahn K. Hakes, Ph.D.<sup>3</sup>

11  
12 <sup>1</sup> Mailman School of Public Health at Columbia University, Health Policy and Management  
13

14  
15 <sup>2</sup> Stanford University School of Medicine  
16

17 <sup>3</sup> US Bureau of the Census  
18  
19  
20  
21

22 Corresponding Author  
23

24 Peter Muennig, MD, MPH  
25

26 Professor  
27

28 Mailman School of Public Health  
29

30 Columbia University  
31

32 722 West 168th St.  
33

34 ARB 4th Floor  
35

36 New York, NY 10032  
37

38 347-533-3415  
39

40 Pm124@columbia.edu  
41  
42  
43  
44  
45  
46  
47

48 Keywords: Earned Income Tax Credit; Quasi-Experimental Studies; Social Determinants of  
49 Health  
50  
51

52  
53 Word Count: 3,449  
54  
55  
56  
57  
58  
59  
60

1  
2  
3  
4  
5  
6  
7  
8  
9  
10  
11  
12  
13  
14  
15  
16  
17  
18  
19  
20  
21  
22  
23  
24  
25  
26  
27  
28  
29  
30  
31  
32  
33  
34  
35  
36  
37  
38  
39  
40  
41  
42  
43  
44  
45  
46  
47  
48  
49  
50  
51  
52  
53  
54  
55  
56  
57  
58  
59  
60

Disclaimer: This paper is released to inform interested parties of research and to encourage discussion. Any views expressed on statistical, methodological, technical, or operational issues are those of the authors and not necessarily those of the U.S. Census Bureau.

For peer review only

## Abstract

**Objective:** To estimate the impact of state-level supplements of the Earned Income Tax Credit (EITC) on mortality in the United States. The EITC supplements the wages of lower-income workers by providing larger returns when taxes are filed.

**Setting:** Nationwide sample spanning 25 cohorts of people across every state in the United States

**Participants:** 793,000 respondents within the National Longitudinal Mortality Survey (NLMS) between 1986-2011, a representative sample of the United States.

**Intervention:** State-level supplementation to the EITC program. Some, but not all, states added EITC supplementation to varying degrees beginning in 1986 (Wisconsin) and most recently in 2015 (California). Participants who were eligible in states with supplementary programs were compared with those who were not eligible for supplementation. Comparisons were made both before and after implementation of the supplementary program (a difference-in-difference, intent-to-treat analysis). This quasi-experimental approach further controls for age, gender, marital status, race or ethnicity, educational attainment, income, and employment status.

**Primary and secondary outcome measure:** the primary outcome measure was survival at 10 years. Secondary outcome measures included survival at 5 years and survival to the end of the intervention period.

**Results:** We find an association between state supplemental EITC and survival, with a hazard ratio of 0.97 (95% confidence interval = 0.951-0.996) for each \$100 of EITC increase ( $p < 0.05$ ). **Conclusion:** State-level supplemental EITC may be an effective means of increasing survival in the US.

**Strengths and limitations of this study**

- We use a quasi-experimental design (difference-in-difference with intent-to-treat), which allows for stronger inference than an associational study
- We utilize the largest health dataset in the United States, which allows us to study individual-level impacts on mortality, a definitive health outcome, over many decades
- We use a powerful identification strategy that allows us to identify individuals who were eligible for the program that we evaluate and those who are not
- Nevertheless, it is possible that states that become rich can subsequently afford other health-producing investments, and these changes in state-level wealth could explain our observed effects

## Introduction

In the US life expectancy has declined relative to other nations for decades as lower wages and higher health costs have reduced disposable income for households below the US median for earnings<sup>1-3</sup>. One policy that has promise to address declining income, and potentially declining health, is the Earned Income Tax Credit (EITC). The EITC is designed to supplement earnings in lower-paying jobs by providing a monetary credit to low-income workers who file taxes. This program has the effect of restoring some of the disposable income lost to lower-income households as high paying factory jobs have disappeared in the United States, thereby potentially also restoring health<sup>4</sup>.

The EITC is the largest means-tested anti-poverty program in the United States<sup>5</sup>. Historically it has received broad bipartisan support, having been created under President Ford in 1975, and subsequently expanded during the terms of Presidents Clinton, Bush, and Obama<sup>6</sup>.

Poverty is associated with a greater burden of disease than smoking and obesity combined in the US<sup>7 8</sup>. Poverty takes a toll on health by increasing one's risk of environmental exposures (e.g., living near freeway intersections or living in housing with peeling lead paint) and reducing purchasing power (e.g., of healthy food or out-of-pocket medical expenses)<sup>4</sup>. Likewise, EITC can increase employment, which is also associated with decreased mortality (possibly because it can increase access to employer-based health insurance, health savings accounts, and social capital)<sup>9-12</sup>. However, the largest health effects associated with EITC are now believed to arise from incremental changes in psychological stress, which causes the release of glucocorticoids that damage neural

1  
2  
3 structures associated with executive function, memory, and homeostatic processes, such as  
4  
5 the regulation of blood sugar and blood pressure.<sup>10 13-18</sup>  
6  
7

8       Glucocorticoids are meant to increase survival among our hunter-gatherer  
9  
10 ancestors by diverting glucose and oxygen from the brain and reproductive organs to  
11  
12 muscles, allowing us to flee predators.<sup>19 20</sup> Modern-day society, unfortunately, is filled with  
13  
14 stressors that activate these primitive, neurotoxic systems, leading to hypertension,  
15  
16 obesity, and interfering with health behaviors.<sup>18</sup>  
17  
18

19       Notably, even small increases in income support among low-income households can  
20  
21 lead to increased short-term perceived financial security even if the gains are too small to  
22  
23 increase savings (and therefore demonstrable financial security).<sup>10 21 22</sup> Financial security  
24  
25 may be one of the most important determinants of stress among low-income households.<sup>16</sup>  
26  
27  
28  
29  
30  
31  
32  
33  
34  
35  
36  
37  
38  
39  
40  
41  
42  
43  
44  
45  
46  
47  
48  
49  
50  
51  
52  
53  
54  
55  
56  
57  
58  
59  
60

23-26. By alleviating poverty, the EITC may also serve as a tool for reducing premature mortality in the US.<sup>9 25</sup>

34       The hypothesis that EITC might reduce premature mortality is generally supported  
35  
36 by previous research, however some studies have shown null findings while at least one  
37  
38 other has shown an increase in obesity associated with EITC <sup>27-35</sup>. Therefore, there is  
39  
40 reasonable uncertainty as to whether the program improves health, and there is a strong  
41  
42 need for more causal research. Because some states have supplemented federal EITC and  
43  
44 some have not, this invites a quasi-experimental analysis in which natural variation in state  
45  
46 policies can be used to estimate the impact of state-level supplemental EITC on health or  
47  
48 survival. However, to our knowledge, there is only one dataset that is capable of identifying  
49  
50 large numbers of individuals who are eligible for EITC by their state of residence that also  
51  
52  
53  
54  
55  
56  
57  
58  
59  
60

1  
2  
3 provides longer-term follow up of their survival effects—the National Longitudinal  
4  
5 Mortality Survey (NLMS).<sup>36</sup>  
6  
7

8           The size of the EITC tax credit varies considerably by family size and marital status.  
9  
10 While an adult with no children can earn up to \$400 at tax time, single parent with 3  
11  
12 children can earn over \$6,000. When EITC-eligible individuals are identified, it becomes  
13  
14 possible to increase the accuracy of the analysis and to remove confounding of survival  
15  
16 outcomes associated with emigration of healthier individuals to wealthier states <sup>37 38</sup>. Long-  
17  
18 term follow up for survival is necessary because EITC-eligible individuals and families tend  
19  
20 to be under age 65 and employed, and therefore tend to be healthier. The benefit of  
21  
22 reduced exposure to poverty in early- and middle-aged adults is only likely to manifest  
23  
24 after the age of 65 <sup>39</sup>.  
25  
26  
27  
28

29           The NLMS is the largest mortality survey in the US, and allows us to conduct a  
30  
31 targeted and comprehensive examination of the impact of state-level supplemental EITC on  
32  
33 survival. Others have examined variation by family size <sup>28-31 40</sup> and by state level of  
34  
35 supplementation <sup>34</sup>. However, these analyses are limited by assumptions necessary when  
36  
37 using smaller and less detailed datasets.  
38  
39  
40

41           A particular problem faced by some previous quasi-experimental analyses is that it  
42  
43 was necessary to look at aggregate state-level effects (e.g., among those with family  
44  
45 incomes close to the poverty line) rather than effects among individuals with a high-  
46  
47 probability of EITC receipt. By using the very large and detailed NLMS, administered by the  
48  
49 Census Bureau, we are able to identify individuals likely to receive supplemental EITC and  
50  
51 to explore dose-response effects within a quasi-experimental design. According to NLMS  
52  
53  
54  
55  
56  
57  
58  
59  
60



1  
2  
3 and Census Bureau officials, ours is the first study to use longitudinal mortality data from  
4  
5 the NLMS to assess the impacts of state-level supplemental EITC on survival.  
6  
7  
8  
9

## 10 **Methods**

### 11 *Overview*

12  
13  
14  
15 We use survival models to estimate the impact of state-level supplemental EITC on  
16  
17 survival. The time frame for our analysis is 1986-2011, with mortality follow-up through  
18  
19 the end of 2011. During that time frame, federal and state EITC policies regarding eligible  
20  
21 incomes and size of the tax credit changed considerably (Table 1). The tax years we  
22  
23 analyzed were from 1985 to 2010, as the EITC rate applied to tax year  $t$  income would  
24  
25 benefit the family income in year  $t+1$ . Non-recipients were excluded from the analysis.  
26  
27  
28

29 Each respondent's record in our data set is recorded in person-years, extending  
30  
31 from their year of CPS/ASEC interview for the NLMS to their year of exit by death or by  
32  
33 reaching the end of mortality follow up at the end of 2011. We limited our analysis to  
34  
35 individuals under the age of 65 because many Americans will have retired by then and are  
36  
37 ineligible for EITC. However, mortality follow up extends beyond this window. A 64-year-  
38  
39 old at the time of survey would be followed to 69, 74, or until December 31, 2011  
40  
41 depending on the analysis used.  
42  
43  
44  
45  
46  
47

### 48 *Patient and Public Involvement*

49  
50 There was no patient involvement in this study.  
51

### 52 *Data*

1  
2  
3 While the NLMS contains multiple census data sources, the primary source of data is  
4 from the March Annual and Social Economic Supplements of the Current Population  
5 Survey. This supplement is an annual survey designed to collect detailed information about  
6 income, migration, health insurance, and a broader range of general economic data for  
7 persons aged 15 years and over. Roughly 60,000 households are interviewed annually in  
8 the March CPS. In that survey, one member of each household provides information for all  
9 family members.  
10  
11  
12  
13  
14  
15  
16  
17  
18

19 The March CPS and NLMS are weighted and standardized to be reflective of the US  
20 population. The NLMS currently consists of approximately 3.8 million records with over  
21 560,000 identified deaths up through December 31, 2011.<sup>41</sup> We use 793,000 records of  
22 adults aged 18-64 over 26 years (1986-2011, all years were included in our analysis).  
23 These data were weighted to be representative of the U.S. population under age 65 at the  
24 time of interview. The NLMS data from CPS/ASEC is linked to U.S. death certificates  
25 collected by the National Center for Health Statistics via the National Death Index (NDI).  
26  
27  
28  
29  
30  
31  
32  
33  
34  
35

36 Income cutoffs for supplemental EITC eligibility vary by state. Our information on  
37 state EITC cutoffs and eligibility for tax credits comes from source documents generously  
38 provided to us by TAXSIM<sup>42 43</sup>. We also added information from the Minnesota Working  
39 Family Credit from 1998 to 2010<sup>44</sup>, which differs somewhat from credits offered by other  
40 states.  
41  
42  
43  
44  
45  
46  
47  
48  
49

### 50 *Variables*

51  
52 Eligibility for EITC and the size of the tax credit received by eligible households,  
53 were estimated using reported family income, marital status, number of children, and the  
54  
55  
56  
57  
58  
59  
60

1  
2  
3 rules for supplemental EITC eligibility within each state. We use the March CPS to  
4  
5 determine the number of children in each household, the marital status of the  
6  
7 householders, and the inflation-adjusted household income. We then determine whether a  
8  
9 household is eligible for EITC at the federal level as well as the additional credit, if any, for  
10  
11 any given state.  
12  
13

14  
15 Some identification problems that remain: (1) we don't know if the head of  
16  
17 household is consistently employed (and thus eligible to claim EITC); (2) how many years  
18  
19 of state EITC exposure a given family had, because of (a) moving, (b) divorce, (c) changes  
20  
21 in number of kids, or (d) pay raises at work; (3) we were unable to estimate the effects of  
22  
23 total EITC exposure over time based on the year the state adopted EITC (due to  
24  
25 multicollinearity between year of supplemental EITC adoption and other control variables  
26  
27 in the model).  
28  
29

30  
31 The exposure variables of interest for the survival models are the estimated EITC  
32  
33 receipts – “Federal EITC” and “state EITC” – in respondent year ( $t$ ) from family income  
34  
35 earned in year  $t-1$ , as reported in the interview in year  $t$ . The EITC receipts are calculated  
36  
37 from the tax-year specific formulas from TAXSIM, and are applied to the subsequent  
38  
39 person-year observation. Both the “Federal EITC” and “state EITC” receipts are divided into  
40  
41 \$100 units to help with the presentation of parameter estimates from the regressions. The  
42  
43 EITC receipts are converted into constant \$2015 using the Consumer Price Index (CPI).  
44  
45 2015 was used as a year of reference as this was the year in which the variable was created.  
46  
47  
48  
49

50 To adjust for personal characteristics, we include control variables for (a) age at  
51  
52 person-year, (b) sex, (c) marital status, (d) race or ethnicity, (e) educational attainment, (f)  
53  
54 income, and (g) employment status in addition to the state and Federal EITC measures.  
55  
56  
57  
58  
59  
60

1  
2  
3 Other than age, income, and EITC receipts, these variables are measured as binary  
4 indicators. The descriptive statistics for the proportions of those indicators are shown in  
5  
6 Table 2 along with the means of the continuous variables. The central tendency is  
7  
8 expressed as standard deviations (SD) of the continuous variables (SD (x)), and as  
9  
10 standard errors (SE) for the proportion (SE (p)).  
11  
12  
13

14  
15 The categories for sex are male (reference group) and female. For marital status  
16 they are married (reference group) and not married, which includes widows, divorcees,  
17 separated persons, and the never married. The categories for race and ethnicity are  
18 Hispanic, White non-Hispanic (reference group), Black non-Hispanic, American  
19 Indian/Alaskan Native non-Hispanic, and Asian/Pacific Islander non-Hispanic. The  
20 categories for educational attainment are college degree, some college, high school diploma  
21 (reference group), and no diploma. The categories for employment are employed  
22 (reference group), unemployed, and “not in labor force.” These binary indicators are  
23 assigned to each person based on their response at their CPS/ASEC interview (at baseline)  
24 and are used through all person-years. These demographic characteristics are liable to  
25 change as a result of exposure to EITC.  
26  
27  
28  
29  
30  
31  
32  
33  
34  
35  
36  
37  
38  
39

40  
41 Family incomes are asked during their CPS/ASEC interview. The dollar amount at  
42 the time of interview is adjusted to the CPI-adjusted purchasing power of the person-year  
43 for calculation of nominal EITC receipts. Both the family income and EITC receipts are then  
44 adjusted to year 2015 dollars in the regression to keep purchasing power constant across  
45 the range of the time series. We calculated the state EITC benefits received using income,  
46 marriage, and number of children. The maximum income for inclusion in the regression  
47  
48  
49  
50  
51  
52  
53  
54  
55  
56  
57  
58  
59  
60

1  
2  
3 sample also controlled for these variables and the Federal EITC income thresholds for  
4  
5 various family situations.  
6

7  
8 To correct for the right-skewed distribution of income, we use the natural logarithm  
9  
10 for the variable and assign the value of zero when income is zero or negative. The  
11  
12 regression uses age at person-year instead of age at interview in order to properly adjust  
13  
14 for age-relative hazards of mortality.  
15  
16

### 17 18 19 *Model specification* 20

21  
22 We use Cox proportional hazards models (with state level fixed effects and errors  
23  
24 clustered at the primary sampling unit) to estimate the impact of state-level EITC  
25  
26 generosity on 5-year, 10-year, and maximum survival among adults (ages 18-64) between  
27  
28 1986 and 2011. State-level fixed effects, coupled with the use of constant (inflation-  
29  
30 adjusted) \$2015 dollars, are used to address differences between cohorts at each CPS year  
31  
32 of interview. Assumptions for proportionality are met.  
33  
34  
35

36 We used a difference-in-difference model with an intention-to-treat design,  
37  
38 assessing mortality according to people's eligibility for EITC on a state-by-state basis. While  
39  
40 eligibility will diverge from receipt of EITC funds, this design is the best way to assess the  
41  
42 efficacy of the EITC program as it actually exists; discordance between the program's  
43  
44 intended and actual recipients represents an important shortcoming in the program.  
45  
46

47  
48 Selecting a length of follow-up time over which to measure EITC's effects on survival  
49  
50 presents a conflict; shorter follow-up times are unlikely to capture EITC's effects on chronic  
51  
52 disease and other conditions that may impact long-term survival. However, longer follow-  
53  
54 up times introduce more uncertainty about possible changes in the socioeconomic status of  
55  
56  
57  
58  
59  
60

1  
2  
3 the participants in our sample. Because individuals' incomes, household sizes, marital  
4 status, and states of residence are known only at the time of interview in the Current  
5 Population Survey, we do not know how social and demographic variables change over  
6  
7  
8  
9  
10 time.

11  
12 We elected to use 10-year survival rates as our primary outcome measure because it  
13 represents a reasonable window for both capturing differences in survival between groups,  
14 and for minimizing error in our identification of EITC eligibility due to changes in family  
15 income, marital status, or family size (which are increasingly likely with a longer follow-up  
16 window). As a sensitivity analysis, we also estimated models with a shorter follow-up  
17 window (using 5-year survival as the model outcome) as well as models with a longer  
18 follow-up window (using survival rates over the entire follow-up period available for each  
19 respondent in the NLMS).  
20  
21  
22  
23  
24  
25  
26  
27  
28  
29  
30

31 Our set of person-year records consists of those records with "age at interview" of at  
32 least 18 years, and extending up through either (a) "age at person year" of 64 years, (b) the  
33 year of death (with "failure"=1), or (c) end of follow up at 2011. An additional inclusion  
34 rule includes only respondents with estimated family income that is less than twice the  
35 maximum Federal EITC income allowed for the respondent's family size. This income limit  
36 is to eliminate any possible regression distortions caused by observations on high-income  
37 individuals, who may have a different mortality risk pattern than the lower-income  
38 respondents we wish to analyze.  
39  
40  
41  
42  
43  
44  
45  
46  
47  
48  
49

50 All models use the NLMS person weights, which are divided and distributed among  
51 the person-years of the individual. The results of the models report the hazard ratios of  
52 mortality for deviations of each independent variable relative to the reference respondent  
53  
54  
55  
56  
57  
58  
59  
60

1  
2  
3 person-year, which would be (a) at the mean age at person-year, (b) male (c) married, (d)  
4 white non-Hispanic, (e) with a high school diploma, (f) with the average (logged) family  
5 income, and (g) employed, with zero dollars received from Federal or state EITC.  
6  
7  
8  
9  
10

## 11 12 **Results**

13  
14  
15 In interpreting these results, it is important to consider that our final models  
16 differed from their original specification. First, in the original specification, we did not  
17 control for state-level fixed effects. State-level fixed effects were added to control for  
18 differences in state-level policies that might correlate with state EITC benefits. Second, we  
19 had initially used a binary indicator to indicate state EITC receipt. Finally, it was  
20 recommended that we use \$100 increments as a tangible unit of measure because some  
21 recipients less than \$100 while others might receive thousands of dollars.  
22  
23  
24  
25  
26  
27  
28  
29  
30

31 There was significant variation in EITC generosity by state, and there was also a  
32 good deal of variation in the time of program implementation (Table 1). Our analytic  
33 sample included 793,000 adults aged 18-64 from all 50 states and Washington D.C.  
34  
35  
36  
37  
38  
39 Summary statistics for the analytic sample are presented in Table 2.

40  
41 Table 3 shows the results of three Cox proportional hazards regressions. The  
42 functional form of, and covariates within, all three regressions is the same but the follow up  
43 time differs (5-years, 10-years, and maximum). Our control variables show associations  
44 with mortality that are statistically significant at  $p < 0.001$  and consistent with previous  
45 research.<sup>36</sup> For example, mortality risk declines with income and employment but  
46 increases with age (Table 3). Females have a lower mortality risk than males, and Blacks  
47 have a much higher risk than Whites. Asians have the lowest mortality risk of any group.  
48  
49  
50  
51  
52  
53  
54  
55  
56  
57  
58  
59  
60

1  
2  
3 State EITC receipt is statistically-significant in all three models with a hazard ratio  
4  
5 (HR) = 0.973 (95% confidence interval [CI] = 0.951-0.996) for the 10-year follow up  
6  
7 model. Mortality hazards increased slightly as follow-up time increased (from 0.968 for the  
8  
9 5-year follow up model [95% CI = 0.941-0.995] to 0.979 for the maximum follow up [95%  
10  
11 CI = 0.959-0.999]. Federal EITC shows a small but statistically-significant increase in  
12  
13 mortality hazards in maximal follow up (1.003, 95% CI = 1.001-1005).  
14  
15  
16  
17  
18  
19

## 20 Discussion

21  
22 In this study, we examine the survival impact of state-level supplements to EITC  
23  
24 using a quasi-experimental design and individual-level data for 793,000 adults aged 18-64.  
25  
26 After adjusting for age, sex, race, education, family income, and employment status, we find  
27  
28 evidence for mortality benefits conferred by state-level supplemental EITC.  
29  
30

31 A hazard ratio of 0.97 over a 10-year period of follow-up corresponds to an  
32  
33 increase in life expectancy of roughly 2 weeks for every \$100 of state-level EITC  
34  
35 supplementation (in constant 2015 US dollars).<sup>45</sup> The results of a recent randomized-  
36  
37 controlled trial (RTC) suggests that the average eligible recipient might receive hundreds  
38  
39 of dollars in benefits per year, suggesting that the program has the potential to  
40  
41 meaningfully improve population health.<sup>8 35</sup>  
42  
43  
44

45 We also find very small negative impacts from the Federal EITC in one of the three  
46  
47 models (a 0.3% increase in hazards). We cannot rule out statistical artifact (collinearity  
48  
49 with state EITC receipts, partially systematic residuals over income that  $\ln(\text{income})$  does  
50  
51 not address, an imperfect control for state fixed effects). However, it is also possible that  
52  
53 once state-level benefits are controlled for we are picking up the hazards associated with  
54  
55  
56  
57  
58  
59  
60



1  
2  
3 employment (e.g., accidents while commuting or on the job) that are independent of the  
4  
5 credits themselves.  
6

### 7 8 *Strengths and limitations* 9

10 Our study explores temporal and spatial variation in outcome measures across  
11 states as well as dose-response effects across individuals. The NLMS affords a very large  
12 sample size, long-term mortality follow-up, and information on EITC eligibility at the  
13 individual level, providing a good deal of resolution relative to a previous study that  
14 examined aggregate state-level effects.<sup>46</sup> Moreover, because the sample size is very large  
15 and the NDI covers all states, it is possible to identify individual-level effects, and to do so  
16 irrespective of where the individual died. We were able to identify those participants who  
17 were eligible for EITC using TAXSIM, and to compare across states that did and did not  
18 have supplemental programs. Our study is consistent with previous studies, which showed  
19 that, while EITC receipt may be a risk factor for obesity, overall health and survival benefits  
20 have been noted<sup>27-33 35 40</sup>.  
21  
22  
23  
24  
25  
26  
27  
28  
29  
30  
31  
32  
33  
34  
35

36 However, our study is subject to a number of important limitations. First, it is  
37 difficult to precisely estimate the survival benefit associated with EITC because we were  
38 unable to quantify the number of years that any given participant was exposed to the  
39 credit. Moreover, while quasi-experimental in nature, there could be state-level factors that  
40 confound estimates (e.g., states with EITC supplementation may also offer other social  
41 welfare programs, offer fewer worker protection regulations, or be more likely to receive  
42 healthy migrants from other states). On the other hand, Federal regulations have  
43 disproportionately benefited poorer states that are less likely to implement supplemental  
44 EITC because these states have historically been high risk, low regulation. Despite the  
45  
46  
47  
48  
49  
50  
51  
52  
53  
54  
55  
56  
57  
58  
59  
60

1  
2  
3 potential for states to implement EITC in ways that may also correlate with mortality, our  
4 quasi-experimental design coupled with controls for income and employment produces  
5 estimates that should have a much higher degree of internal validity than associational  
6 studies.  
7  
8  
9  
10  
11

12 Additionally, our results include both states with refundable tax credits and non-  
13 refundable tax credits. While we know which states offer refundable or non-refundable  
14 credits, we simply don't know enough about individual household deductions or eligibility  
15 for other credits to know when non-refundability is a constraining limit or not, or how  
16 large a portion of the credit is retained by the state (on average) when there are non-  
17 refundability rules. What we do know is that non-refundable credits mean that our  
18 calculated benefits represent the top-level estimate of state EITC receipts, so that our test  
19 for a significant effect (possibly from a smaller number of state EITC benefit dollars) is  
20 conservative (that is, less likely to produce a low p-value). Finally, in a related limitation,  
21 we only observe EITC receipt in the year that the participant was interviewed, but record  
22 deaths no matter which state they occurred in. To the extent that a participant moved from  
23 a state with benefits to one without (or vice versa), the signal in our estimate is weakened,  
24 again rendering the estimate more conservative.  
25  
26  
27  
28  
29  
30  
31  
32  
33  
34  
35  
36  
37  
38  
39  
40  
41  
42  
43  
44

### 45 *Conclusions*

46  
47 While the EITC is an effective anti-poverty program, it tends to provide fairly  
48 modest income support<sup>8</sup>. These modest program effects may be offset by the fact that the  
49 vast majority of people who apply for EITC remain on EITC for many years<sup>47</sup>. The  
50 cumulative effects the income support provided by EITC over the years may therefore add  
51  
52  
53  
54  
55  
56  
57  
58  
59  
60

1  
2  
3 up to survival benefits over time. Nevertheless, a recent RCT showed that just three years  
4  
5 of exposure to supplemental income from EITC can produce measurable impacts on health-  
6  
7 related quality of life, at least among females.<sup>26</sup>  
8  
9

10 Our findings are important from a policy perspective. There is now reasonable  
11  
12 evidence that America's declining health and life expectancy are related to the declining  
13  
14 fortunes of lower- and middle-class families.<sup>48</sup> While some of the decline must be  
15  
16 addressed with structural changes to the health system<sup>3</sup> and other anti-poverty policies,<sup>25</sup>  
17  
18 <sup>49</sup> we find encouraging evidence that expanding the EITC could produce significant benefits  
19  
20 for health.  
21  
22  
23  
24  
25  
26  
27  
28  
29  
30  
31  
32  
33  
34  
35  
36  
37  
38  
39  
40  
41  
42  
43  
44  
45  
46  
47  
48  
49  
50  
51  
52  
53  
54  
55  
56  
57  
58  
59  
60

### Contributorship statement

The paper topic and analytical approach were conceived of by PM. PM led the final drafting of the paper and helped guide the analysis. JH conducted the statistical analyses, and made major contributions to the revisions of the manuscript. DV drafted much of the first version of the paper, particularly the methods and results, and helped guide the analysis in collaboration with JH. All authors made substantial efforts in responding to reviewer comments.

### Competing interests

The authors have no competing interests to disclose.

### Funding

Any opinions and conclusions expressed herein are those of the authors and do not necessarily reflect the views of the U.S. Census Bureau. All results have been reviewed to ensure that no confidential information is disclosed. The statistical summaries reported in this document have been cleared by the Census Bureau's Disclosure Review Board release authorization number CBDRB-FY19-366. This project was funded by the National Institute on Aging (5R01AG054466).

### Data sharing statement

1  
2  
3  
4  
5  
6  
7  
8  
9  
10  
11  
12  
13  
14  
15  
16  
17  
18  
19  
20  
21  
22  
23  
24  
25  
26  
27  
28  
29  
30  
31  
32  
33  
34  
35  
36  
37  
38  
39  
40  
41  
42  
43  
44  
45  
46  
47  
48  
49  
50  
51  
52  
53  
54  
55  
56  
57  
58  
59  
60

The National Longitudinal Mortality Survey (NLMS) is maintained by the United States Bureau of the Census and contains identified data. These data can be accessed only by certified personnel.

For peer review only

## References

1. Woolf SH, Schoomaker H. Life Expectancy and Mortality Rates in the United States, 1959-2017. *JAMA* 2019;322(20):1996-2016.
2. Muennig PA, Glied SA. What changes in survival rates tell us about us health care. *Health Aff (Millwood)* 2010;29(11):2105-13. doi: 10.1377/hlthaff.2010.0073
3. Polsky D, Grande D. The burden of health care costs for working families--implications for reform. *N Engl J Med* 2009;361(5):437-9. doi: 361/5/437 [pii] 10.1056/NEJMp0905297 [published Online First: 2009/07/31]
4. Adler NE, Stewart, J. Health disparities across the lifespan: Meaning, methods, and mechanisms. *Ann N Y Acad Sci* 2010;1186:5-23.
5. Hamad R, Rehkopf DH. Poverty and Child Development: A Longitudinal Study of the Impact of the Earned Income Tax Credit. *Am J Epidemiol* 2016;183(9):775-84. doi: 10.1093/aje/kwv317 [published Online First: 2016/04/09]
6. Haskins R, Margolis G. Show me the evidence: Obama's fight for rigor and results in social policy: Brookings Institution Press 2014.
7. Muennig P, Fiscella K, Tancredi D, et al. The relative health burden of selected social and behavioral risk factors in the United States: implications for policy. *Am J Public Health* 2010;100(9):1758-64. doi: 10.2105/AJPH.2009.165019
8. Paycheck Plus: Expanded Earned Income Tax Credit for Single Adults. Available online at: [https://www.mdrc.org/sites/default/files/PaycheckPlus\\_FinalReport.pdf](https://www.mdrc.org/sites/default/files/PaycheckPlus_FinalReport.pdf) Accessed: 8/22/19. [
9. Plescia M, Emmanuel C. Reducing Health Disparities by Addressing Social Determinants of Health The Mecklenburg County Experience. *N C Med J* 2014;75(6):417-21.
10. Kawachi I, Subramanian SV, Kim D. Social Capital and Health. New York: Springer 2010.
11. Sorlie PD, Rogot E. Mortality by employment status in the National Longitudinal Mortality Study. *Am J Epidemiol* 1990;132(5):983-92.
12. Rogot E, Sorlie PD, Johnson NJ. Life expectancy by employment status, income, and education in the National Longitudinal Mortality Study. *Public Health Rep* 1992;107(4):457-61.
13. McEwen BS, Mirsky AE. How socioeconomic status may "get under the skin" and affect the heart. *Eur Heart J* 2002;23(22):1727-8.
14. McEwen BS, Nasca C, Gray JD. Stress effects on neuronal structure: hippocampus, amygdala, and prefrontal cortex. *Neuropsychopharmacology* 2016;41(1):3.
15. Sapolsky RM, Krey LC, McEwen BS. Prolonged glucocorticoid exposure reduces hippocampal neuron number: implications for aging. *J Neurosci* 1985;5(5):1222-7.
16. Seeman T, Epel E, Gruenewald T, et al. Socio - economic differentials in peripheral biology: Cumulative allostatic load. *Ann N Y Acad Sci* 2010;1186(1):223-39.
17. Fredrickson BL, Grewen KM, Coffey KA, et al. A functional genomic perspective on human well-being. *Proceedings of the National Academy of Sciences* 2013;110(33):13684-89.
18. McEwen BS. Protective and damaging effects of stress mediators. *N Engl J Med* 1998;338(3):171-9.

19. Roy M, Sapolsky RM. The exacerbation of hippocampal excitotoxicity by glucocorticoids is not mediated by apoptosis. *Neuroendocrinology* 2003;77(1):24-31.
20. Sapolsky RM, Krey LC, McEwen BS. The neuroendocrinology of stress and aging: the glucocorticoid cascade hypothesis. *Endocr Rev* 1986;7(3):284-301.
21. Despard M, Perantie D, Oliphant J, et al. Do EITC recipients use tax refunds to get ahead? New evidence from refund to savings. *CSD research brief* 2015(15-38)
22. Sykes J, Križ K, Edin K, et al. Dignity and dreams: What the Earned Income Tax Credit (EITC) means to low-income families. *Am Sociol Rev* 2015;80(2):243-67.
23. Seeman TE, McEwen BS, Rowe JW, et al. Allostatic load as a marker of cumulative biological risk: MacArthur studies of successful aging. *Proc Natl Acad Sci U S A* 2001;98(8):4770-5.
24. Santiago CD, Wadsworth ME, Stump J. Socioeconomic status, neighborhood disadvantage, and poverty-related stress: Prospective effects on psychological syndromes among diverse low-income families. *J Econ Psychol* 2011;32(2):218-30.
25. Courtin E, Kim S, Song S, et al. Can Social Policies Improve Health? A Systematic Review and Meta-Analysis of 38 Randomized Trials. *Milbank Q* 2020 doi: 10.1111/1468-0009.12451 [published Online First: 2020/03/20]
26. Courtin E, Aloisi K, Miller C, et al. The Health Effects Of Expanding The Earned Income Tax Credit: Results From New York City. *Health Aff (Millwood)* 2020;39(7)
27. Rehkopf DH, Strully KW, Dow WH. The short-term impacts of Earned Income Tax Credit disbursement on health. *Int J Epidemiol* 2014;43(6):1884-94. doi: 10.1093/ije/dyu172 [published Online First: 2014/08/31]
28. Averett S, Wang Y. The effects of Earned Income Tax Credit payment expansion on maternal smoking. *Health Econ* 2013;22(11):1344-59. doi: 10.1002/hec.2886 [published Online First: 2012/12/15]
29. Cowan B, Tefft N. Education, Maternal Smoking, and the Earned Income Tax Credit. *The BE Journal of Economic Analysis & Policy* 2012;12(1):39.
30. Larrimore J. Does a higher income have positive health effects? Using the earned income tax credit to explore the income-health gradient. *Milbank Q* 2011;89(4):694-727. doi: 10.1111/j.1468-0009.2011.00647.x [published Online First: 2011/12/23]
31. Strully KW, Rehkopf DH, Xuan Z. Effects of Prenatal Poverty on Infant Health: State Earned Income Tax Credits and Birth Weight. *Am Sociol Rev* 2010;75(4):534-62. doi: 10.1177/0003122410374086 [published Online First: 2011/06/07]
32. Schmeiser MD. Expanding wallets and waistlines: the impact of family income on the BMI of women and men eligible for the Earned Income Tax Credit. *Health Econ* 2009;18(11):1277-94. doi: 10.1002/hec.1430 [published Online First: 2009/01/15]
33. Wicks-Lim J, Arno PS. Improving population health by reducing poverty: New York's Earned Income Tax Credit. *SSM Popul Health* 2017;3:373-81. doi: 10.1016/j.ssmph.2017.03.006 [published Online First: 2018/01/20]
34. Muennig PA, Mohit B, Wu J, et al. Cost Effectiveness of the Earned Income Tax Credit as a Health Policy Investment. *American journal of preventive medicine* 2016;51(6):874-81. doi: 10.1016/j.amepre.2016.07.001 [published Online First: 2016/09/12]
35. Muennig P, Allen H, Courtin E. Mental health impacts of increasing the Earned Income Tax Credit: evidence from a randomized trial. 2020



- 1  
2  
3 36. Sorlie PD, Backlund E, Keller JB. US mortality by economic, demographic, and social  
4 characteristics: the National Longitudinal Mortality Study. *Am J Public Health*  
5 1995;85(7):949-56.  
6  
7 37. Preston SH, Elo IT. Anatomy of a Municipal Triumph: New York City's Upsurge in Life  
8 Expectancy. *Population and Development Review* 2013;40(1):1-29.  
9  
10 38. Muennig P, Masters R, Vail D, et al. The effects of New York City's coordinated public  
11 health programmes on mortality through 2011. *Int J Epidemiol* 2017;46(4):1239-48.  
12 doi: 10.1093/ije/dyw290  
13  
14 39. Muennig P. Health selection vs. causation in the income gradient: what can we learn  
15 from graphical trends? *J Health Care Poor Underserved* 2008;19(2):574-9. doi:  
16 10.1353/hpu.0.0018  
17  
18 40. Hamad R, Rehkopf DH. Poverty, Pregnancy, and Birth Outcomes: A Study of the Earned  
19 Income Tax Credit. *Paediatr Perinat Epidemiol* 2015;29(5):444-52. doi:  
20 10.1111/ppe.12211 [published Online First: 2015/07/28]  
21  
22 41. United States Census Bureau. NLMS Public-Use Reference Manual. Available online at:  
23 <https://www.google.com/search?client=safari&rls=en&q=NLMS+Public-Use+Reference+Manual.&ie=UTF-8&oe=UTF-8>. Accessed 1/7/2020. [Available  
24 from:  
25 [https://www.census.gov/did/www/nlms/publications/docs/referenceManual\\_v4.pdf](https://www.census.gov/did/www/nlms/publications/docs/referenceManual_v4.pdf)  
26 accessed 12/15/2018.  
27  
28 42. Feenberg D, Coutts E. An Introduction to the TAXSIM Model. *J Policy Anal Manage*  
29 1993;12(1):189-94. doi: 10.2307/3325474  
30  
31 43. Feenberg D. TAXSIM: State EITC provisions 1977-2016 [Available from:  
32 <http://users.nber.org/~taxsim/state-eitc.html>. accessed 12/15/2018.  
33  
34 44. Feenberg D. Minnesota Working Family Credit Table 2018 [Available from:  
35 [http://users.nber.org/~taxsim/eitc\\_MN.pdf](http://users.nber.org/~taxsim/eitc_MN.pdf).  
36  
37 45. Muennig PA, Gold MR. Using the years-of-healthy-life measure to calculate QALYs. *Am J*  
38 *Prev Med* 2001;20(1):35-9.  
39  
40 46. Muennig PA, Mohit B, Wu J, et al. Cost Effectiveness of the Earned Income Tax Credit as  
41 a Health Policy Investment. *Am J Prev Med* 2016 doi: 10.1016/j.amepre.2016.07.001  
42  
43 47. Grogger J. Welfare transitions in the 1990s: The economy, welfare policy, and the EITC. *J*  
44 *Policy Anal Manage* 2004;23(4):671-95.  
45  
46 48. Muennig PA, Reynolds M, Fink DS, et al. America's Declining Well-Being, Health, and Life  
47 Expectancy: Not Just a White Problem. *Am J Public Health* 2018;108(12):1626-31.  
48 doi: 10.2105/AJPH.2018.304585 [published Online First: 2018/09/27]  
49  
50 49. Courtin E, Kim S, Song S, et al. Can Social Policies Improve Health? A Systematic Review  
51 and Meta-Analysis of 38 Randomized Trials. Accepted at *Milbank Quarterly*. In  
52 Press. 2020  
53  
54  
55  
56  
57  
58  
59  
60



Table 1. The Supplemental Earned Income Tax Credit (EITC) benefit by state and the year enacted.\*

| State                | Year Enacted | Percent Addition to Federal EITC |
|----------------------|--------------|----------------------------------|
| California           | 2015†        | 85                               |
| Colorado             | 1999, 2013†  | 10                               |
| Connecticut          | 2011         | 30                               |
| Delaware             | 2005         | 20                               |
| District of Columbia | 2000         | 40                               |
| Illinois             | 2000         | 10                               |
| Indiana              | 1999         | 9                                |
| Iowa                 | 1989         | 15                               |
| Kansas               | 1998         | 17                               |
| Louisiana            | 2007         | 3.5                              |
| Maine                | 2000         | 5                                |
| Maryland             | 1987         | 25.5                             |
| Massachusetts        | 1997         | 23                               |
| Michigan             | 2006         | 6                                |
| Minnesota            | 1991         | 35                               |
| Nebraska             | 2006         | 10                               |
| New Jersey           | 2000         | 30                               |
| New Mexico           | 2007         | 10                               |
| New York             | 1994         | 30                               |
| Ohio                 | 2013†        | 10                               |
| Oklahoma             | 2002         | 5                                |
| Oregon               | 1997         | 8                                |
| Rhode Island         | 1986         | 12.5                             |
| Vermont              | 1988         | 32                               |
| Virginia             | 2004         | 20                               |
| Washington           | 2000         | 10                               |
| Wisconsin            | 1989         | 11                               |

\*Details of implementation and variability by family size and year available from TAXSIM<sup>24</sup>-<sup>25</sup>

†Not included in analysis as having supplemental EITC because program implementation was after the period of our mortality follow-up.

Table 2: Descriptive statistics for lower-income adult person-years (ages 18-64 at initial interview) in the National Longitudinal Mortality Survey (NLMS), 1986-2011. (United States Bureau of the Census approval DRB approval number CBDRB-FY19-366.)

| Variable                                                                           | Maximum follow up <sup>1</sup> |                  | 10-year follow up <sup>1</sup> |                  | 5-year follow-up <sup>1</sup> |                  |
|------------------------------------------------------------------------------------|--------------------------------|------------------|--------------------------------|------------------|-------------------------------|------------------|
|                                                                                    | Mean                           | (SD(x))<br>SE(p) | Mean                           | (SD(x))<br>SE(p) | Mean                          | (SD(x))<br>SE(p) |
| Age at person-year                                                                 | 43.2                           | (13.5)           | 41.6                           | (13.2)           | 40.5                          | (13.2)           |
| Female (%)                                                                         | 52.5                           | 0.03             | 52.2                           | 0.03             | 52.0                          | 0.05             |
| Married at interview (%)                                                           | 47.5                           | 0.03             | 46.5                           | 0.03             | 45.8                          | 0.04             |
| Race/ethnicity:                                                                    |                                |                  |                                |                  |                               |                  |
| Hispanic (%)                                                                       | 15.1                           | 0.02             | 15.9                           | 0.02             | 16.5                          | 0.03             |
| White (%)                                                                          | 65.5                           | 0.03             | 64.3                           | 0.03             | 63.5                          | 0.04             |
| Black (%)                                                                          | 15.1                           | 0.02             | 15.2                           | 0.02             | 15.3                          | 0.03             |
| Native American (%)                                                                | 0.87                           | 0.004            | 0.88                           | 0.005            | 0.86                          | 0.007            |
| Asian/ Pacific Islander (%)                                                        | 3.5                            | 0.010            | 3.7                            | 0.013            | 3.8                           | 0.016            |
| Highest educational attainment at time of interview:                               |                                |                  |                                |                  |                               |                  |
| No high school diploma (%)                                                         | 20.1                           | 0.02             | 19.8                           | 0.03             | 19.3                          | 0.03             |
| High school diploma (%)                                                            | 37.7                           | 0.03             | 37.0                           | 0.03             | 36.5                          | 0.04             |
| Some college education (%)                                                         | 26.6                           | 0.03             | 27.3                           | 0.03             | 27.7                          | 0.04             |
| College degree or higher (%)                                                       | 15.6                           | 0.02             | 16.0                           | 0.03             | 16.4                          | 0.03             |
| Family income at time of interview \$2015; (mean, SD)                              | 40,500                         | (22,500)         | 40,000                         | (22,500)         | 39,500                        | (22,500)         |
| Family income, \$2015 (as natural log. of income at time of interview; mean, (SD)) | 10.2                           | (1.8)            | 10.1                           | (1.8)            | 10.1                          | (1.9)            |
| Employment status at time of interview:                                            |                                |                  |                                |                  |                               |                  |
| Employed                                                                           | 68.0                           | 0.03             | 67.6                           | 0.03             | 66.9                          | 0.04             |
| Unemployed                                                                         | 11.2                           | 0.02             | 11.9                           | 0.03             | 12.7                          | 0.03             |
| Not in labor force                                                                 | 20.8                           | 0.02             | 20.5                           | 0.03             | 20.4                          | 0.04             |
| Receiving State EITC (%) <sup>1</sup>                                              | 27.8                           | 0.03             | 27.2                           | 0.03             | 27.3                          | 0.04             |
| Federal EITC receipts (in \$100 units; mean, (SD)) <sup>1</sup>                    | 14.8                           | (13.0)           | 15.9                           | (14.1)           | 16.3                          | (14.5)           |
| State EITC receipts (in \$100 units; mean (SD)) <sup>1</sup>                       | 3.26                           | (4.06)           | 3.29                           | (4.13)           | 3.32                          | (4.18)           |
| Sample size (person-years) <sup>2</sup>                                            | 8,820,000                      |                  | 5,960,000                      |                  | 3,530,000                     |                  |
| Sample size (respondents) <sup>2</sup>                                             | 793,000                        |                  | 793,000                        |                  | 793,000                       |                  |

|                               |        |        |        |
|-------------------------------|--------|--------|--------|
| Number of deaths <sup>2</sup> | 48,000 | 24,000 | 12,000 |
|-------------------------------|--------|--------|--------|

Note: results weighted to be representative of the 0-64 U.S. population in 2015.

<sup>1</sup>SD = standard deviation; SE = standard error; EITC = Earned Income Tax Credit.

For Tmax: Conditional means for <fed\_eitc> on 2.250,000 PY (206,000 persons), conditional means for <st\_eitc> on 281,000 PY (42,500 persons). [Correlation is 0.285 among Fed. EITC recipients.]

For T10: Conditional means for <fed\_eitc> on 1,540,000 PY (206,000 persons), conditional means for <st\_eitc> on 246,000 PY (42,500 persons). [Correlation is 0.291 among <fed\_eitc> recipients.]

For T05: Conditional means for <fed\_eitc> on 912,000 PY (206,000 persons), conditional means for <st\_eitc> on 168,000 PY (42,500 persons). [Correlation is 0.301 among <fed\_eitc> recipients.]

<sup>2</sup>Sample counts are rounded according to the U.S. Census Bureau Disclosure Review Board Disclosure Avoidance Guidelines.

Note: The statistics in this table have been cleared by the Census Bureau's Disclosure Review Board with release authorization number CBDRB-FY19-366.

Table 3: Cox proportional hazard models of supplemental EITC's impact on mortality risk for lower-income adults for adult person-years (ages 18-64) in the NLMS, 1986-2011. (United States Bureau of the Census approval DRB approval number CBDRB-FY19-366.)

| Variable                                                                               | Maximum follow-up |             | 10-year follow-up |             | 5-year follow-up    |             |
|----------------------------------------------------------------------------------------|-------------------|-------------|-------------------|-------------|---------------------|-------------|
|                                                                                        | Hazard ratio      | 95% CI      | Hazard ratio      | 95% CI      | Hazard ratio        | 95% CI      |
| Age at person-year (years)                                                             | 1.071***          | 1.070-1.073 | 1.067***          | 1.066-1.069 | 1.064***            | 1.062-1.066 |
| Female                                                                                 | 0.595***          | 0.576-0.614 | 0.593***          | 0.571-0.616 | 0.586***            | 0.559-0.614 |
| Married at time of interview                                                           | 0.692***          | 0.669-0.715 | 0.685***          | 0.658-0.712 | 0.686***            | 0.653-0.720 |
| Race/ethnicity (White, non-Hispanic is referent):                                      |                   |             |                   |             |                     |             |
| Hispanic                                                                               | 0.588***          | 0.550-0.629 | 0.590***          | 0.546-0.638 | 0.600***            | 0.547-0.659 |
| Black                                                                                  | 1.086**           | 1.039-1.135 | 1.091***          | 1.037-1.149 | 1.085*              | 1.019-1.156 |
| Native American                                                                        | 1.26***           | 1.10-1.45   | 1.28**            | 1.10-1.49   | 1.30**              | 1.08-1.56   |
| Asian/ Pacific Islander                                                                | 0.578***          | 0.509-0.657 | 0.579***          | 0.500-0.670 | 0.580***            | 0.486-0.691 |
| Highest educational attainment at time of interview (High school diploma is referent): |                   |             |                   |             |                     |             |
| No high school diploma                                                                 | 1.111***          | 1.070-1.154 | 1.087***          | 1.039-1.137 | 1.072*              | 1.013-1.134 |
| Some college education                                                                 | 0.889***          | 0.850-0.929 | 0.887***          | 0.842-0.934 | 0.884***            | 0.829-0.941 |
| College degree or higher                                                               | 0.701***          | 0.659-0.746 | 0.713***          | 0.663-0.767 | 0.729***            | 0.667-0.796 |
| Family income, 2015 dollars (as natural log. of income at time of interview)           | 0.986***          | 0.977-0.995 | 0.988*            | 0.978-0.998 | 0.989 <sup>NS</sup> | 0.977-1.001 |
| Employment status at time of interview (Employed is referent):                         |                   |             |                   |             |                     |             |
| Unemployed                                                                             | 3.20***           | 3.06-3.34   | 3.47***           | 3.30-3.6    | 3.78***             | 3.56-4.01   |
| Not in labor force                                                                     | 1.79***           | 1.72-1.86   | 1.91***           | 1.82-2.00   | 2.03***             | 1.91-2.15   |
| Earned Income Tax Credit (EITC) in \$100 units of 2015\$                               |                   |             |                   |             |                     |             |

|                                           |           |             |                     |             |                     |             |
|-------------------------------------------|-----------|-------------|---------------------|-------------|---------------------|-------------|
| Federal EITC                              | 1.003*    | 1.001-1.005 | 1.002 <sup>NS</sup> | 1.000-1.005 | 1.002 <sup>NS</sup> | 0.999-1.005 |
| State EITC                                | 0.979*    | 0.959-0.999 | 0.973*              | 0.951-0.996 | 0.968*              | 0.941-0.995 |
| Sample size (N=person-years) <sup>1</sup> | 8,820,000 |             | 5,960,000           |             | 3,530,000           |             |

2  
3  
4  
5 All three Cox proportional hazard models include state fixed-effects corrections (state HRs not shown), and time-trends based  
6 on the year of the respondent's ACS interview.  
7 \* p<0.05, \*\* p<0.01, \*\*\* p<0.001  
8 <sup>1</sup> Sample counts are rounded according to the U.S. Census Bureau Disclosure Review Board Disclosure Avoidance Guidelines.  
9 All models included N=793,000 respondents.  
10 <sup>NS</sup> Not statistically significant at p <= 0.05.  
11 Note: The statistics in this table have been cleared by the Census Bureau's Disclosure Review Board with release authorization  
number CBDRB-FY19-366.

## STROBE Statement—checklist of items that should be included in reports of observational studies

|                              | Item No                                                                                                                                                                                                                                                                                                   | Recommendation                                                                                                                                                                                                                                                                                                                                                                                                                                                         | Page No |
|------------------------------|-----------------------------------------------------------------------------------------------------------------------------------------------------------------------------------------------------------------------------------------------------------------------------------------------------------|------------------------------------------------------------------------------------------------------------------------------------------------------------------------------------------------------------------------------------------------------------------------------------------------------------------------------------------------------------------------------------------------------------------------------------------------------------------------|---------|
| <b>Title and abstract</b>    | 1                                                                                                                                                                                                                                                                                                         | (a) Indicate the study's design with a commonly used term in the title or the abstract                                                                                                                                                                                                                                                                                                                                                                                 | 1       |
|                              |                                                                                                                                                                                                                                                                                                           | (b) Provide in the abstract an informative and balanced summary of what was done and what was found                                                                                                                                                                                                                                                                                                                                                                    | 2       |
| <b>Introduction</b>          |                                                                                                                                                                                                                                                                                                           |                                                                                                                                                                                                                                                                                                                                                                                                                                                                        |         |
| Background/rationale         | 2                                                                                                                                                                                                                                                                                                         | Explain the scientific background and rationale for the investigation being reported                                                                                                                                                                                                                                                                                                                                                                                   | 3       |
| Objectives                   | 3                                                                                                                                                                                                                                                                                                         | State specific objectives, including any prespecified hypotheses                                                                                                                                                                                                                                                                                                                                                                                                       | 3       |
| <b>Methods</b>               |                                                                                                                                                                                                                                                                                                           |                                                                                                                                                                                                                                                                                                                                                                                                                                                                        |         |
| Study design                 | 4                                                                                                                                                                                                                                                                                                         | Present key elements of study design early in the paper                                                                                                                                                                                                                                                                                                                                                                                                                | 5       |
| Setting                      | 5                                                                                                                                                                                                                                                                                                         | Describe the setting, locations, and relevant dates, including periods of recruitment, exposure, follow-up, and data collection                                                                                                                                                                                                                                                                                                                                        | 5       |
| Participants                 | 6                                                                                                                                                                                                                                                                                                         | (a) <i>Cohort study</i> —Give the eligibility criteria, and the sources and methods of selection of participants. Describe methods of follow-up<br><i>Case-control study</i> —Give the eligibility criteria, and the sources and methods of case ascertainment and control selection. Give the rationale for the choice of cases and controls<br><i>Cross-sectional study</i> —Give the eligibility criteria, and the sources and methods of selection of participants | 5       |
|                              |                                                                                                                                                                                                                                                                                                           | (b) <i>Cohort study</i> —For matched studies, give matching criteria and number of exposed and unexposed<br><i>Case-control study</i> —For matched studies, give matching criteria and the number of controls per case                                                                                                                                                                                                                                                 | NA      |
| Variables                    | 7                                                                                                                                                                                                                                                                                                         | Clearly define all outcomes, exposures, predictors, potential confounders, and effect modifiers. Give diagnostic criteria, if applicable                                                                                                                                                                                                                                                                                                                               | 6       |
| Data sources/<br>measurement | 8*                                                                                                                                                                                                                                                                                                        | For each variable of interest, give sources of data and details of methods of assessment (measurement). Describe comparability of assessment methods if there is more than one group                                                                                                                                                                                                                                                                                   | 7       |
| Bias                         | 9                                                                                                                                                                                                                                                                                                         | Describe any efforts to address potential sources of bias                                                                                                                                                                                                                                                                                                                                                                                                              | 11      |
| Study size                   | 10                                                                                                                                                                                                                                                                                                        | Explain how the study size was arrived at                                                                                                                                                                                                                                                                                                                                                                                                                              |         |
| Quantitative variables       | 11                                                                                                                                                                                                                                                                                                        | Explain how quantitative variables were handled in the analyses. If applicable, describe which groupings were chosen and why                                                                                                                                                                                                                                                                                                                                           | 6       |
| Statistical methods          | 12                                                                                                                                                                                                                                                                                                        | (a) Describe all statistical methods, including those used to control for confounding                                                                                                                                                                                                                                                                                                                                                                                  | 7       |
|                              |                                                                                                                                                                                                                                                                                                           | (b) Describe any methods used to examine subgroups and interactions                                                                                                                                                                                                                                                                                                                                                                                                    | NA      |
|                              | (c) Explain how missing data were addressed                                                                                                                                                                                                                                                               | 4                                                                                                                                                                                                                                                                                                                                                                                                                                                                      |         |
|                              | (d) <i>Cohort study</i> —If applicable, explain how loss to follow-up was addressed<br><i>Case-control study</i> —If applicable, explain how matching of cases and controls was addressed<br><i>Cross-sectional study</i> —If applicable, describe analytical methods taking account of sampling strategy | 6                                                                                                                                                                                                                                                                                                                                                                                                                                                                      |         |
|                              | (e) Describe any sensitivity analyses                                                                                                                                                                                                                                                                     |                                                                                                                                                                                                                                                                                                                                                                                                                                                                        |         |

Continued on next page

1  
2  
3  
4  
5  
6  
7  
8  
9  
10  
11  
12  
13  
14  
15  
16  
17  
18  
19  
20  
21  
22  
23  
24  
25  
26  
27  
28  
29  
30  
31  
32  
33  
34  
35  
36  
37  
38  
39  
40  
41  
42  
43  
44  
45  
46  
47  
48  
49  
50  
51  
52  
53  
54  
55  
56  
57  
58  
59  
60**Results**

|                  |     |                                                                                                                                                                                                              |    |
|------------------|-----|--------------------------------------------------------------------------------------------------------------------------------------------------------------------------------------------------------------|----|
| Participants     | 13* | (a) Report numbers of individuals at each stage of study—eg numbers potentially eligible, examined for eligibility, confirmed eligible, included in the study, completing follow-up, and analysed            | 4  |
|                  |     | (b) Give reasons for non-participation at each stage                                                                                                                                                         | NA |
|                  |     | (c) Consider use of a flow diagram                                                                                                                                                                           | NA |
| Descriptive data | 14* | (a) Give characteristics of study participants (eg demographic, clinical, social) and information on exposures and potential confounders                                                                     | 6  |
|                  |     | (b) Indicate number of participants with missing data for each variable of interest                                                                                                                          | NA |
|                  |     | (c) <i>Cohort study</i> —Summarise follow-up time (eg, average and total amount)                                                                                                                             | 7  |
| Outcome data     | 15* | <i>Cohort study</i> —Report numbers of outcome events or summary measures over time                                                                                                                          | 10 |
|                  |     | <i>Case-control study</i> —Report numbers in each exposure category, or summary measures of exposure                                                                                                         | NA |
|                  |     | <i>Cross-sectional study</i> —Report numbers of outcome events or summary measures                                                                                                                           | NA |
| Main results     | 16  | (a) Give unadjusted estimates and, if applicable, confounder-adjusted estimates and their precision (eg, 95% confidence interval). Make clear which confounders were adjusted for and why they were included | 10 |
|                  |     | (b) Report category boundaries when continuous variables were categorized                                                                                                                                    | NA |
|                  |     | (c) If relevant, consider translating estimates of relative risk into absolute risk for a meaningful time period                                                                                             | NA |
| Other analyses   | 17  | Report other analyses done—eg analyses of subgroups and interactions, and sensitivity analyses                                                                                                               | NA |

**Discussion**

|                  |    |                                                                                                                                                                            |    |
|------------------|----|----------------------------------------------------------------------------------------------------------------------------------------------------------------------------|----|
| Key results      | 18 | Summarise key results with reference to study objectives                                                                                                                   | 14 |
| Limitations      | 19 | Discuss limitations of the study, taking into account sources of potential bias or imprecision. Discuss both direction and magnitude of any potential bias                 | 15 |
| Interpretation   | 20 | Give a cautious overall interpretation of results considering objectives, limitations, multiplicity of analyses, results from similar studies, and other relevant evidence | 13 |
| Generalisability | 21 | Discuss the generalisability (external validity) of the study results                                                                                                      | 11 |

**Other information**

|         |    |                                                                                                                                                               |    |
|---------|----|---------------------------------------------------------------------------------------------------------------------------------------------------------------|----|
| Funding | 22 | Give the source of funding and the role of the funders for the present study and, if applicable, for the original study on which the present article is based | 15 |
|---------|----|---------------------------------------------------------------------------------------------------------------------------------------------------------------|----|

\*Give information separately for cases and controls in case-control studies and, if applicable, for exposed and unexposed groups in cohort and cross-sectional studies.

**Note:** An Explanation and Elaboration article discusses each checklist item and gives methodological background and published examples of transparent reporting. The STROBE checklist is best used in conjunction with this article (freely available on the Web sites of PLoS Medicine at <http://www.plosmedicine.org/>, Annals of Internal Medicine at <http://www.annals.org/>, and Epidemiology at <http://www.epidem.com/>). Information on the STROBE Initiative is available at [www.strobe-statement.org](http://www.strobe-statement.org).
